# Supplementary material
Source: publisher figshare collection journal article supplement (https://gsajournals.figshare.com/ndownloader/files/14675411)
Supplement: Supplementary file 1 [file 14675411]

## Sheet: #1
frame	time	PC	TB	ant isth	mid isth	post isth
69	00:00:02.687000
70	00:00:02.726000
71	00:00:02.766000
72	00:00:02.805000
73	00:00:02.845000
74	00:00:02.884000
75	00:00:02.924000
76	00:00:02.963000
77	00:00:03.003000
78	00:00:03.042000
79	00:00:03.082000
80	00:00:03.121000
81	00:00:03.161000
82	00:00:03.200000
83	00:00:03.240000
84	00:00:03.279000
85	00:00:03.319000
86	00:00:03.358000
87	00:00:03.398000
88	00:00:03.437000
89	00:00:03.477000
90	00:00:03.516000
91	00:00:03.556000
92	00:00:03.595000
93	00:00:03.635000
94	00:00:03.674000
95	00:00:03.714000
96	00:00:03.754000
97	00:00:03.793000
98	00:00:03.833000
99	00:00:03.872000
100	00:00:03.911000
101	00:00:03.951000
102	00:00:03.991000
103	00:00:04.030000
104	00:00:04.070000
105	00:00:04.109000
106	00:00:04.149000
107	00:00:04.188000
108	00:00:04.228000
109	00:00:04.267000
110	00:00:04.307000
111	00:00:04.346000
112	00:00:04.386000
113	00:00:04.425000
114	00:00:04.465000
115	00:00:04.504000
116	00:00:04.544000
117	00:00:04.583000
118	00:00:04.623000
119	00:00:04.662000
120	00:00:04.702000
121	00:00:04.741000
122	00:00:04.781000
123	00:00:04.820000
124	00:00:04.860000
125	00:00:04.899000
126	00:00:04.939000
127	00:00:04.978000
128	00:00:05.019000
129	00:00:05.058000
130	00:00:05.098000
131	00:00:05.137000
132	00:00:05.177000
133	00:00:05.216000
134	00:00:05.256000
135	00:00:05.295000
136	00:00:05.335000
137	00:00:05.374000
138	00:00:05.414000
139	00:00:05.453000
140	00:00:05.493000
141	00:00:05.533000
142	00:00:05.572000
143	00:00:05.612000
144	00:00:05.651000
145	00:00:05.691000
146	00:00:05.730000
147	00:00:05.770000
148	00:00:05.809000
149	00:00:05.849000
150	00:00:05.888000
151	00:00:05.928000
152	00:00:05.967000
153	00:00:06.007000
154	00:00:06.046000
155	00:00:06.086000
156	00:00:06.125000
157	00:00:06.165000
158	00:00:06.204000
159	00:00:06.244000
160	00:00:06.283000
161	00:00:06.323000
162	00:00:06.362000
163	00:00:06.402000
164	00:00:06.441000
165	00:00:06.481000
166	00:00:06.520000
167	00:00:06.560000
168	00:00:06.599000
169	00:00:06.639000
170	00:00:06.678000
171	00:00:06.718000
172	00:00:06.757000
173	00:00:06.797000
174	00:00:06.836000
175	00:00:06.876000
176	00:00:06.915000
177	00:00:06.955000
178	00:00:06.995000
179	00:00:07.034000
180	00:00:07.074000
181	00:00:07.113000
182	00:00:07.153000
183	00:00:07.192000
184	00:00:07.231000
185	00:00:07.271000
186	00:00:07.311000
187	00:00:07.350000
188	00:00:07.390000
189	00:00:07.429000
190	00:00:07.469000
191	00:00:07.508000
192	00:00:07.548000
193	00:00:07.587000
194	00:00:07.627000
195	00:00:07.666000
196	00:00:07.706000
197	00:00:07.745000
198	00:00:07.785000
199	00:00:07.824000
200	00:00:07.864000
201	00:00:07.903000
202	00:00:07.943000
203	00:00:07.982000
204	00:00:08.022000
205	00:00:08.061000
206	00:00:08.101000
207	00:00:08.140000
208	00:00:08.180000
209	00:00:08.219000
210	00:00:08.259000
211	00:00:08.298000
212	00:00:08.338000
213	00:00:08.377000
214	00:00:08.417000
215	00:00:08.456000
216	00:00:08.496000
217	00:00:08.535000
218	00:00:08.575000
219	00:00:08.614000
220	00:00:08.654000
221	00:00:08.709000
222	00:00:08.733000
223	00:00:08.772000
224	00:00:08.812000
225	00:00:08.852000
226	00:00:08.891000
227	00:00:08.931000
228	00:00:08.970000
229	00:00:09.010000
230	00:00:09.049000
231	00:00:09.089000
232	00:00:09.128000
233	00:00:09.168000
234	00:00:09.207000
235	00:00:09.247000
236	00:00:09.286000
237	00:00:09.326000
238	00:00:09.365000
239	00:00:09.405000
240	00:00:09.444000
241	00:00:09.484000
242	00:00:09.523000
243	00:00:09.563000
244	00:00:09.602000
245	00:00:09.642000
246	00:00:09.681000
247	00:00:09.721000
248	00:00:09.760000
249	00:00:09.800000
250	00:00:09.839000
251	00:00:09.879000
252	00:00:09.918000
253	00:00:09.958000
254	00:00:09.997000
255	00:00:10.037000
256	00:00:10.076000
257	00:00:10.116000
258	00:00:10.155000
259	00:00:10.195000
260	00:00:10.234000
261	00:00:10.274000
262	00:00:10.313000
263	00:00:10.353000
264	00:00:10.393000
265	00:00:10.432000
266	00:00:10.472000
267	00:00:10.511000
268	00:00:10.551000
269	00:00:10.590000
270	00:00:10.630000
271	00:00:10.669000
272	00:00:10.709000
273	00:00:10.748000
274	00:00:10.788000
275	00:00:10.827000
276	00:00:10.867000
277	00:00:10.906000
278	00:00:10.946000
279	00:00:10.985000
280	00:00:11.025000
281	00:00:11.064000
282	00:00:11.104000
283	00:00:11.143000
284	00:00:11.183000
285	00:00:11.222000
286	00:00:11.262000
287	00:00:11.301000
288	00:00:11.341000
289	00:00:11.380000
290	00:00:11.420000
291	00:00:11.459000
292	00:00:11.499000
293	00:00:11.538000
294	00:00:11.578000
295	00:00:11.617000
296	00:00:11.657000
297	00:00:11.696000
298	00:00:11.736000
299	00:00:11.775000
300	00:00:11.815000
301	00:00:11.855000
302	00:00:11.894000
303	00:00:11.934000
304	00:00:11.973000
305	00:00:12.013000
306	00:00:12.052000
307	00:00:12.091000
308	00:00:12.131000
309	00:00:12.171000
310	00:00:12.210000
311	00:00:12.250000
312	00:00:12.289000
313	00:00:12.329000
314	00:00:12.368000
315	00:00:12.408000
316	00:00:12.447000
317	00:00:12.487000
318	00:00:12.526000
319	00:00:12.566000
320	00:00:12.605000
321	00:00:12.645000
322	00:00:12.684000
323	00:00:12.724000
324	00:00:12.763000
325	00:00:12.803000
326	00:00:12.842000
327	00:00:12.882000
328	00:00:12.921000
329	00:00:12.961000
330	00:00:13
331	00:00:13.040000
332	00:00:13.079000
333	00:00:13.119000
334	00:00:13.158000
335	00:00:13.198000
336	00:00:13.237000
337	00:00:13.277000
338	00:00:13.316000
339	00:00:13.356000
340	00:00:13.395000
341	00:00:13.435000
342	00:00:13.474000
343	00:00:13.514000
344	00:00:13.553000
345	00:00:13.593000
346	00:00:13.632000
347	00:00:13.672000
348	00:00:13.712000
349	00:00:13.751000
350	00:00:13.791000
351	00:00:13.830000
352	00:00:13.870000
353	00:00:13.909000
354	00:00:13.949000
355	00:00:13.988000
356	00:00:14.028000
357	00:00:14.067000
358	00:00:14.107000
359	00:00:14.146000
360	00:00:14.186000
361	00:00:14.225000
362	00:00:14.265000
363	00:00:14.304000
364	00:00:14.344000
365	00:00:14.383000
366	00:00:14.423000
367	00:00:14.462000
368	00:00:14.502000
369	00:00:14.541000
370	00:00:14.581000
371	00:00:14.620000
372	00:00:14.660000
373	00:00:14.699000
374	00:00:14.739000
375	00:00:14.778000
376	00:00:14.818000
377	00:00:14.857000
378	00:00:14.897000
379	00:00:14.936000
380	00:00:14.976000
381	00:00:15.016000
382	00:00:15.056000
383	00:00:15.095000
384	00:00:15.135000
385	00:00:15.175000
386	00:00:15.214000
387	00:00:15.254000
388	00:00:15.293000
389	00:00:15.333000
390	00:00:15.372000
391	00:00:15.412000
392	00:00:15.451000
393	00:00:15.491000
394	00:00:15.530000
395	00:00:15.570000
396	00:00:15.609000
397	00:00:15.649000
398	00:00:15.688000
399	00:00:15.728000
400	00:00:15.767000
401	00:00:15.807000
402	00:00:15.846000
403	00:00:15.886000
404	00:00:15.925000
405	00:00:15.965000
406	00:00:16.004000
407	00:00:16.044000
408	00:00:16.083000
409	00:00:16.123000
410	00:00:16.162000
411	00:00:16.202000
412	00:00:16.241000
413	00:00:16.281000
414	00:00:16.320000
415	00:00:16.360000
416	00:00:16.399000
417	00:00:16.439000
418	00:00:16.478000
419	00:00:16.518000
420	00:00:16.557000
421	00:00:16.597000
422	00:00:16.636000
423	00:00:16.676000
424	00:00:16.716000
425	00:00:16.755000
426	00:00:16.795000
427	00:00:16.834000
428	00:00:16.874000
429	00:00:16.913000
430	00:00:16.953000
431	00:00:16.992000
432	00:00:17.032000
433	00:00:17.071000
434	00:00:17.111000
435	00:00:17.150000
436	00:00:17.190000
437	00:00:17.229000
438	00:00:17.269000
439	00:00:17.308000
440	00:00:17.348000
441	00:00:17.387000
442	00:00:17.427000
443	00:00:17.466000
444	00:00:17.506000
445	00:00:17.545000
446	00:00:17.585000
447	00:00:17.624000
448	00:00:17.664000
449	00:00:17.703000
450	00:00:17.743000
451	00:00:17.782000
452	00:00:17.822000
453	00:00:17.861000
454	00:00:17.901000
455	00:00:17.940000
456	00:00:17.980000
457	00:00:18.019000
458	00:00:18.059000
459	00:00:18.098000
460	00:00:18.138000
461	00:00:18.177000
462	00:00:18.217000
463	00:00:18.256000
464	00:00:18.296000
465	00:00:18.335000
466	00:00:18.375000
467	00:00:18.414000
468	00:00:18.454000
469	00:00:18.493000
470	00:00:18.533000
471	00:00:18.573000
472	00:00:18.612000
473	00:00:18.652000
474	00:00:18.691000
475	00:00:18.731000
476	00:00:18.770000
477	00:00:18.810000
478	00:00:18.849000
479	00:00:18.889000
480	00:00:18.928000
481	00:00:18.968000
482	00:00:19.007000
483	00:00:19.047000
484	00:00:19.086000
485	00:00:19.126000
486	00:00:19.165000
487	00:00:19.205000
488	00:00:19.244000
489	00:00:19.284000
490	00:00:19.323000
491	00:00:19.363000
492	00:00:19.402000
493	00:00:19.442000
494	00:00:19.481000
495	00:00:19.521000
496	00:00:19.560000
497	00:00:19.600000
498	00:00:19.639000
499	00:00:19.679000
500	00:00:19.718000
501	00:00:19.758000
502	00:00:19.797000
503	00:00:19.837000
504	00:00:19.876000
505	00:00:19.916000
506	00:00:19.955000
507	00:00:19.995000
508	00:00:20.035000
509	00:00:20.074000
510	00:00:20.114000
511	00:00:20.153000
512	00:00:20.193000
513	00:00:20.232000
514	00:00:20.272000
515	00:00:20.311000
516	00:00:20.351000
517	00:00:20.390000
518	00:00:20.430000
519	00:00:20.469000
520	00:00:20.509000
521	00:00:20.548000
522	00:00:20.588000
523	00:00:20.627000
524	00:00:20.667000
525	00:00:20.706000
526	00:00:20.746000
527	00:00:20.785000
528	00:00:20.825000
529	00:00:20.864000
530	00:00:20.904000
531	00:00:20.943000
532	00:00:20.983000
533	00:00:21.022000
534	00:00:21.062000
535	00:00:21.101000
536	00:00:21.141000
537	00:00:21.180000
538	00:00:21.220000
539	00:00:21.259000
540	00:00:21.299000
541	00:00:21.338000
542	00:00:21.378000
543	00:00:21.417000
544	00:00:21.457000
545	00:00:21.496000
546	00:00:21.536000
547	00:00:21.576000
548	00:00:21.615000
549	00:00:21.655000
550	00:00:21.694000
551	00:00:21.734000
552	00:00:21.773000
553	00:00:21.813000
554	00:00:21.852000
555	00:00:21.892000
556	00:00:21.931000
557	00:00:21.971000
558	00:00:22.010000
559	00:00:22.050000
560	00:00:22.089000
561	00:00:22.129000
562	00:00:22.174000
563	00:00:22.247000
564	00:00:22.287000
565	00:00:22.326000
566	00:00:22.366000
567	00:00:22.405000
568	00:00:22.445000
569	00:00:22.484000
570	00:00:22.524000
571	00:00:22.563000
572	00:00:22.603000
573	00:00:22.642000
574	00:00:22.682000
575	00:00:22.721000
576	00:00:22.761000
577	00:00:22.800000
578	00:00:22.840000
579	00:00:22.879000
580	00:00:22.919000
581	00:00:22.958000
582	00:00:22.998000
583	00:00:23.037000
584	00:00:23.077000
585	00:00:23.116000
586	00:00:23.156000
587	00:00:23.195000
588	00:00:23.235000
589	00:00:23.274000
590	00:00:23.314000
591	00:00:23.354000
592	00:00:23.393000
593	00:00:23.433000
594	00:00:23.472000
595	00:00:23.512000
596	00:00:23.551000
597	00:00:23.591000
598	00:00:23.630000
599	00:00:23.670000
600	00:00:23.709000
601	00:00:23.749000
602	00:00:23.788000
603	00:00:23.828000
604	00:00:23.867000
605	00:00:23.907000
606	00:00:23.946000
607	00:00:23.986000
608	00:00:24.025000
609	00:00:24.065000
610	00:00:24.104000
611	00:00:24.144000
612	00:00:24.183000
613	00:00:24.223000
614	00:00:24.262000
615	00:00:24.302000
616	00:00:24.341000
617	00:00:24.381000
618	00:00:24.420000
619	00:00:24.460000
620	00:00:24.499000
621	00:00:24.539000
622	00:00:24.578000
623	00:00:24.618000
624	00:00:24.657000
625	00:00:24.697000
626	00:00:24.736000
627	00:00:24.776000
628	00:00:24.815000
629	00:00:24.855000
630	00:00:24.895000
631	00:00:24.934000
632	00:00:24.974000
633	00:00:25.014000
634	00:00:25.054000
635	00:00:25.093000
636	00:00:25.133000
637	00:00:25.172000
638	00:00:25.212000
639	00:00:25.251000

## Sheet: #2
frame	time	PC	TB	ant isth	mid isth	post isth
1	00:00:00
2	00:00:00.039000
3	00:00:00.079000
4	00:00:00.116000
5	00:00:00.178000
6	00:00:00.209000
7	00:00:00.256000
8	00:00:00.287000
9	00:00:00.334000
10	00:00:00.381000
11	00:00:00.412000
12	00:00:00.459000
13	00:00:00.490000
14	00:00:00.537000
15	00:00:00.568000
16	00:00:00.615000
17	00:00:00.646000
18	00:00:00.668000
19	00:00:00.708000
20	00:00:00.747000
21	00:00:00.787000
22	00:00:00.826000
23	00:00:00.866000
24	00:00:00.905000
25	00:00:00.945000
26	00:00:00.984000
27	00:00:01.024000
28	00:00:01.063000
29	00:00:01.103000
30	00:00:01.142000
31	00:00:01.182000
32	00:00:01.221000
33	00:00:01.261000
34	00:00:01.300000
35	00:00:01.340000
36	00:00:01.379000
37	00:00:01.419000
38	00:00:01.458000
39	00:00:01.498000
40	00:00:01.537000
41	00:00:01.577000
42	00:00:01.616000
43	00:00:01.656000
44	00:00:01.695000
45	00:00:01.735000
46	00:00:01.775000
47	00:00:01.814000
48	00:00:01.854000
49	00:00:01.893000
50	00:00:01.933000
51	00:00:01.972000
52	00:00:02.012000
53	00:00:02.051000
54	00:00:02.091000
55	00:00:02.130000
56	00:00:02.170000
57	00:00:02.209000
58	00:00:02.249000
59	00:00:02.288000
60	00:00:02.328000
61	00:00:02.367000
62	00:00:02.407000
63	00:00:02.446000
64	00:00:02.486000
65	00:00:02.525000
66	00:00:02.565000
67	00:00:02.604000
68	00:00:02.644000
69	00:00:02.683000
70	00:00:02.723000
71	00:00:02.762000
72	00:00:02.802000
73	00:00:02.841000
74	00:00:02.881000
75	00:00:02.920000
76	00:00:02.960000
77	00:00:02.999000
78	00:00:03.039000
79	00:00:03.078000
80	00:00:03.118000
81	00:00:03.157000
82	00:00:03.197000
83	00:00:03.237000
84	00:00:03.276000
85	00:00:03.316000
86	00:00:03.355000
87	00:00:03.396000
88	00:00:03.435000
89	00:00:03.474000
90	00:00:03.514000
91	00:00:03.554000
92	00:00:03.593000
93	00:00:03.633000
94	00:00:03.672000
95	00:00:03.712000
96	00:00:03.751000
97	00:00:03.791000
98	00:00:03.830000
99	00:00:03.870000
100	00:00:03.909000
101	00:00:03.949000
102	00:00:03.988000
103	00:00:04.028000
104	00:00:04.067000
105	00:00:04.107000
106	00:00:04.146000
107	00:00:04.186000
108	00:00:04.225000
109	00:00:04.265000
110	00:00:04.304000
111	00:00:04.344000
112	00:00:04.383000
113	00:00:04.423000
114	00:00:04.462000
115	00:00:04.502000
116	00:00:04.541000
117	00:00:04.581000
118	00:00:04.620000
119	00:00:04.660000
120	00:00:04.699000
121	00:00:04.739000
122	00:00:04.778000
123	00:00:04.818000
124	00:00:04.857000
125	00:00:04.897000
126	00:00:04.936000
127	00:00:04.976000
128	00:00:05.015000
129	00:00:05.055000
130	00:00:05.095000
131	00:00:05.134000
132	00:00:05.174000
133	00:00:05.213000
134	00:00:05.253000
135	00:00:05.292000
136	00:00:05.332000
137	00:00:05.371000
138	00:00:05.411000
139	00:00:05.450000
140	00:00:05.490000
141	00:00:05.529000
142	00:00:05.569000
143	00:00:05.608000
144	00:00:05.648000
145	00:00:05.687000
146	00:00:05.727000
147	00:00:05.766000
148	00:00:05.806000
149	00:00:05.845000
150	00:00:05.885000
151	00:00:05.924000
152	00:00:05.964000
153	00:00:06.003000
154	00:00:06.043000
155	00:00:06.082000
156	00:00:06.122000
157	00:00:06.161000
158	00:00:06.201000
159	00:00:06.240000
160	00:00:06.280000
161	00:00:06.319000
162	00:00:06.359000
163	00:00:06.398000
164	00:00:06.438000
165	00:00:06.477000
166	00:00:06.517000
167	00:00:06.556000
168	00:00:06.596000
169	00:00:06.636000
170	00:00:06.675000
171	00:00:06.715000
172	00:00:06.754000
173	00:00:06.794000
174	00:00:06.833000
175	00:00:06.873000
176	00:00:06.912000
177	00:00:06.952000
178	00:00:06.991000
179	00:00:07.031000
180	00:00:07.070000
181	00:00:07.110000
182	00:00:07.149000
183	00:00:07.189000
184	00:00:07.228000
185	00:00:07.268000
186	00:00:07.307000
187	00:00:07.347000
188	00:00:07.386000
189	00:00:07.426000
190	00:00:07.465000
191	00:00:07.505000
192	00:00:07.544000
193	00:00:07.584000
194	00:00:07.623000
195	00:00:07.663000
196	00:00:07.702000
197	00:00:07.742000
198	00:00:07.781000
199	00:00:07.821000
200	00:00:07.860000
201	00:00:07.900000
202	00:00:07.939000
203	00:00:07.979000
204	00:00:08.018000
205	00:00:08.058000
206	00:00:08.098000
207	00:00:08.137000
208	00:00:08.177000
209	00:00:08.216000
210	00:00:08.256000
211	00:00:08.295000
212	00:00:08.335000
213	00:00:08.374000
214	00:00:08.414000
215	00:00:08.453000
216	00:00:08.493000
217	00:00:08.532000
218	00:00:08.572000
219	00:00:08.611000
220	00:00:08.651000
221	00:00:08.690000
222	00:00:08.730000
223	00:00:08.769000
224	00:00:08.809000
225	00:00:08.848000
226	00:00:08.888000
227	00:00:08.927000
228	00:00:08.967000
229	00:00:09.006000
230	00:00:09.046000
231	00:00:09.085000
232	00:00:09.125000
233	00:00:09.164000
234	00:00:09.204000
235	00:00:09.243000
236	00:00:09.283000
237	00:00:09.322000
238	00:00:09.362000
239	00:00:09.401000
240	00:00:09.441000
241	00:00:09.480000
242	00:00:09.520000
243	00:00:09.559000
244	00:00:09.599000
245	00:00:09.638000
246	00:00:09.678000
247	00:00:09.717000
248	00:00:09.757000
249	00:00:09.796000
250	00:00:09.836000
251	00:00:09.875000
252	00:00:09.915000
253	00:00:09.955000
254	00:00:09.994000
255	00:00:10.034000
256	00:00:10.073000
257	00:00:10.113000
258	00:00:10.152000
259	00:00:10.192000
260	00:00:10.231000
261	00:00:10.271000
262	00:00:10.310000
263	00:00:10.350000
264	00:00:10.389000
265	00:00:10.429000
266	00:00:10.468000
267	00:00:10.508000
268	00:00:10.547000
269	00:00:10.587000
270	00:00:10.626000
271	00:00:10.666000
272	00:00:10.705000
273	00:00:10.745000
274	00:00:10.784000
275	00:00:10.824000
276	00:00:10.863000
277	00:00:10.903000
278	00:00:10.942000
279	00:00:10.982000
280	00:00:11.021000
281	00:00:11.061000
282	00:00:11.100000
283	00:00:11.140000
284	00:00:11.179000
285	00:00:11.219000
286	00:00:11.258000
287	00:00:11.298000
288	00:00:11.337000
289	00:00:11.377000
290	00:00:11.417000
291	00:00:11.456000
292	00:00:11.496000
293	00:00:11.535000
294	00:00:11.575000
295	00:00:11.614000
296	00:00:11.654000
297	00:00:11.693000
298	00:00:11.733000
299	00:00:11.772000
300	00:00:11.812000
301	00:00:11.851000
302	00:00:11.891000
303	00:00:11.930000
304	00:00:11.970000
305	00:00:12.009000
306	00:00:12.049000
307	00:00:12.088000
308	00:00:12.128000
309	00:00:12.167000
310	00:00:12.207000
311	00:00:12.246000
312	00:00:12.286000
313	00:00:12.325000
314	00:00:12.365000
315	00:00:12.404000
316	00:00:12.444000
317	00:00:12.483000
318	00:00:12.523000
319	00:00:12.562000
320	00:00:12.602000
321	00:00:12.641000
322	00:00:12.681000
323	00:00:12.720000
324	00:00:12.760000
325	00:00:12.799000
326	00:00:12.839000
327	00:00:12.878000
328	00:00:12.918000
329	00:00:12.958000
330	00:00:12.997000
331	00:00:13.037000
332	00:00:13.076000
333	00:00:13.116000
334	00:00:13.155000
335	00:00:13.195000
336	00:00:13.234000
337	00:00:13.274000
338	00:00:13.313000
339	00:00:13.353000
340	00:00:13.393000
341	00:00:13.433000
342	00:00:13.472000
343	00:00:13.512000
344	00:00:13.551000
345	00:00:13.591000
346	00:00:13.630000
347	00:00:13.670000
348	00:00:13.709000
349	00:00:13.749000
350	00:00:13.788000
351	00:00:13.828000
352	00:00:13.867000
353	00:00:13.907000
354	00:00:13.946000
355	00:00:13.986000
356	00:00:14.025000
357	00:00:14.065000
358	00:00:14.104000
359	00:00:14.144000
360	00:00:14.183000
361	00:00:14.223000
362	00:00:14.262000
363	00:00:14.302000
364	00:00:14.341000
365	00:00:14.381000
366	00:00:14.420000
367	00:00:14.460000
368	00:00:14.500000
369	00:00:14.539000
370	00:00:14.578000
371	00:00:14.618000
372	00:00:14.657000
373	00:00:14.697000
374	00:00:14.736000
375	00:00:14.776000
376	00:00:14.816000
377	00:00:14.855000
378	00:00:14.895000
379	00:00:14.934000
380	00:00:14.974000
381	00:00:15.013000
382	00:00:15.053000
383	00:00:15.092000
384	00:00:15.132000
385	00:00:15.171000
386	00:00:15.211000
387	00:00:15.250000
388	00:00:15.290000
389	00:00:15.329000
390	00:00:15.369000
391	00:00:15.408000
392	00:00:15.448000
393	00:00:15.487000
394	00:00:15.527000
395	00:00:15.566000
396	00:00:15.606000
397	00:00:15.645000
398	00:00:15.685000
399	00:00:15.724000
400	00:00:15.764000
401	00:00:15.803000
402	00:00:15.843000
403	00:00:15.882000
404	00:00:15.922000
405	00:00:15.961000
406	00:00:16.001000
407	00:00:16.040000
408	00:00:16.080000
409	00:00:16.119000
410	00:00:16.159000
411	00:00:16.198000
412	00:00:16.238000
413	00:00:16.278000
414	00:00:16.317000
415	00:00:16.357000
416	00:00:16.396000
417	00:00:16.436000
418	00:00:16.475000
419	00:00:16.515000
420	00:00:16.554000
421	00:00:16.594000
422	00:00:16.633000
423	00:00:16.673000
424	00:00:16.712000
425	00:00:16.752000
426	00:00:16.791000
427	00:00:16.831000
428	00:00:16.870000
429	00:00:16.910000
430	00:00:16.949000
431	00:00:16.989000
432	00:00:17.028000
433	00:00:17.068000
434	00:00:17.107000
435	00:00:17.147000
436	00:00:17.186000
437	00:00:17.226000
438	00:00:17.265000
439	00:00:17.305000
440	00:00:17.344000
441	00:00:17.384000
442	00:00:17.423000
443	00:00:17.463000
444	00:00:17.502000
445	00:00:17.542000
446	00:00:17.581000
447	00:00:17.621000
448	00:00:17.660000
449	00:00:17.700000
450	00:00:17.739000
451	00:00:17.779000
452	00:00:17.819000
453	00:00:17.858000
454	00:00:17.898000
455	00:00:17.937000
456	00:00:17.977000
457	00:00:18.016000
458	00:00:18.056000
459	00:00:18.095000
460	00:00:18.135000
461	00:00:18.174000
462	00:00:18.214000
463	00:00:18.253000
464	00:00:18.293000
465	00:00:18.332000
466	00:00:18.372000
467	00:00:18.411000
468	00:00:18.451000
469	00:00:18.490000
470	00:00:18.530000
471	00:00:18.569000
472	00:00:18.609000
473	00:00:18.648000
474	00:00:18.688000
475	00:00:18.727000
476	00:00:18.767000
477	00:00:18.806000
478	00:00:18.846000
479	00:00:18.885000
480	00:00:18.925000
481	00:00:18.964000
482	00:00:19.004000
483	00:00:19.043000
484	00:00:19.083000
485	00:00:19.122000
486	00:00:19.162000
487	00:00:19.201000
488	00:00:19.241000
489	00:00:19.281000
490	00:00:19.320000
491	00:00:19.359000
492	00:00:19.399000
493	00:00:19.439000
494	00:00:19.478000
495	00:00:19.517000
496	00:00:19.557000
497	00:00:19.597000
498	00:00:19.636000
499	00:00:19.676000
500	00:00:19.715000
501	00:00:19.755000
502	00:00:19.794000
503	00:00:19.834000
504	00:00:19.873000
505	00:00:19.913000
506	00:00:19.952000
507	00:00:19.992000
508	00:00:20.031000
509	00:00:20.071000
510	00:00:20.110000
511	00:00:20.150000
512	00:00:20.189000
513	00:00:20.229000
514	00:00:20.268000
515	00:00:20.308000
516	00:00:20.347000
517	00:00:20.387000
518	00:00:20.426000
519	00:00:20.466000
520	00:00:20.505000
521	00:00:20.545000
522	00:00:20.584000
523	00:00:20.624000
524	00:00:20.663000
525	00:00:20.703000
526	00:00:20.742000
527	00:00:20.782000
528	00:00:20.822000
529	00:00:20.861000
530	00:00:20.900000
531	00:00:20.940000
532	00:00:20.979000
533	00:00:21.019000
534	00:00:21.058000
535	00:00:21.098000
536	00:00:21.138000
537	00:00:21.177000
538	00:00:21.217000
539	00:00:21.256000
540	00:00:21.296000
541	00:00:21.335000
542	00:00:21.375000
543	00:00:21.414000
544	00:00:21.454000
545	00:00:21.493000
546	00:00:21.533000
547	00:00:21.572000
548	00:00:21.612000
549	00:00:21.651000
550	00:00:21.691000
551	00:00:21.730000
552	00:00:21.770000
553	00:00:21.809000
554	00:00:21.849000
555	00:00:21.888000
556	00:00:21.928000
557	00:00:21.967000
558	00:00:22.007000
559	00:00:22.046000
560	00:00:22.086000
561	00:00:22.125000
562	00:00:22.165000
563	00:00:22.204000
564	00:00:22.244000
565	00:00:22.283000
566	00:00:22.323000
567	00:00:22.362000
568	00:00:22.402000
569	00:00:22.441000
570	00:00:22.481000
571	00:00:22.520000
572	00:00:22.560000
573	00:00:22.599000
574	00:00:22.639000
575	00:00:22.679000
576	00:00:22.718000
577	00:00:22.758000
578	00:00:22.797000
579	00:00:22.837000
580	00:00:22.876000
581	00:00:22.916000
582	00:00:22.955000
583	00:00:22.995000
584	00:00:23.034000
585	00:00:23.074000
586	00:00:23.113000
587	00:00:23.153000
588	00:00:23.192000
589	00:00:23.232000
590	00:00:23.271000
591	00:00:23.311000
592	00:00:23.350000
593	00:00:23.391000
594	00:00:23.430000
595	00:00:23.470000
596	00:00:23.509000
597	00:00:23.549000
598	00:00:23.588000
599	00:00:23.628000
600	00:00:23.667000
601	00:00:23.707000
602	00:00:23.746000
603	00:00:23.786000
604	00:00:23.825000
605	00:00:23.865000
606	00:00:23.904000
607	00:00:23.944000
608	00:00:23.983000
609	00:00:24.023000
610	00:00:24.062000
611	00:00:24.102000
612	00:00:24.142000
613	00:00:24.181000
614	00:00:24.220000
615	00:00:24.260000
616	00:00:24.299000
617	00:00:24.339000
618	00:00:24.378000
619	00:00:24.418000
620	00:00:24.458000
621	00:00:24.497000
622	00:00:24.537000
623	00:00:24.576000
624	00:00:24.616000
625	00:00:24.655000
626	00:00:24.695000
627	00:00:24.734000
628	00:00:24.774000
629	00:00:24.813000
630	00:00:24.853000
631	00:00:24.892000
632	00:00:24.932000
633	00:00:24.971000
634	00:00:25.011000
635	00:00:25.050000
636	00:00:25.090000
637	00:00:25.129000
638	00:00:25.169000
639	00:00:25.208000
640	00:00:25.248000
641	00:00:25.287000
642	00:00:25.327000
643	00:00:25.366000
644	00:00:25.406000
645	00:00:25.445000
646	00:00:25.485000
647	00:00:25.524000
648	00:00:25.564000
649	00:00:25.603000
650	00:00:25.643000
651	00:00:25.682000
652	00:00:25.722000
653	00:00:25.761000
654	00:00:25.801000
655	00:00:25.840000
656	00:00:25.880000
657	00:00:25.919000
658	00:00:25.959000
659	00:00:25.999000
660	00:00:26.038000
661	00:00:26.078000
662	00:00:26.117000
663	00:00:26.157000
664	00:00:26.196000
665	00:00:26.236000
666	00:00:26.275000
667	00:00:26.315000
668	00:00:26.354000
669	00:00:26.394000
670	00:00:26.433000
671	00:00:26.473000
672	00:00:26.512000
673	00:00:26.552000
674	00:00:26.591000
675	00:00:26.631000
676	00:00:26.670000
677	00:00:26.710000
678	00:00:26.749000
679	00:00:26.789000
680	00:00:26.828000
681	00:00:26.868000
682	00:00:26.907000
683	00:00:26.947000
684	00:00:26.986000
685	00:00:27.026000
686	00:00:27.065000
687	00:00:27.105000
688	00:00:27.144000
689	00:00:27.184000
690	00:00:27.223000
691	00:00:27.263000
692	00:00:27.302000
693	00:00:27.342000
694	00:00:27.381000
695	00:00:27.421000
696	00:00:27.461000
697	00:00:27.500000
698	00:00:27.540000
699	00:00:27.579000
700	00:00:27.619000
701	00:00:27.658000
702	00:00:27.698000
703	00:00:27.737000
704	00:00:27.777000
705	00:00:27.816000
706	00:00:27.856000
707	00:00:27.895000
708	00:00:27.935000
709	00:00:27.974000
710	00:00:28.014000
711	00:00:28.053000
712	00:00:28.093000
713	00:00:28.132000
714	00:00:28.172000
715	00:00:28.211000
716	00:00:28.251000
717	00:00:28.290000
718	00:00:28.330000
719	00:00:28.369000
720	00:00:28.409000
721	00:00:28.448000
722	00:00:28.488000
723	00:00:28.527000
724	00:00:28.567000
725	00:00:28.606000
726	00:00:28.646000
727	00:00:28.685000
728	00:00:28.725000
729	00:00:28.764000
730	00:00:28.804000
731	00:00:28.843000
732	00:00:28.883000
733	00:00:28.922000
734	00:00:28.962000
735	00:00:29.002000

## Sheet: #3
frame	time	PC	TB	ant isth	mid isth	post isth
45	00:00:01.738000
46	00:00:01.777000
47	00:00:01.817000
48	00:00:01.856000
49	00:00:01.896000
50	00:00:01.936000
51	00:00:01.975000
52	00:00:02.015000
53	00:00:02.054000
54	00:00:02.094000
55	00:00:02.133000
56	00:00:02.173000
57	00:00:02.212000
58	00:00:02.252000
59	00:00:02.291000
60	00:00:02.331000
61	00:00:02.370000
62	00:00:02.410000
63	00:00:02.449000
64	00:00:02.489000
65	00:00:02.528000
66	00:00:02.568000
67	00:00:02.607000
68	00:00:02.647000
69	00:00:02.686000
70	00:00:02.726000
71	00:00:02.765000
72	00:00:02.805000
73	00:00:02.844000
74	00:00:02.884000
75	00:00:02.923000
76	00:00:02.963000
77	00:00:03.002000
78	00:00:03.042000
79	00:00:03.081000
80	00:00:03.121000
81	00:00:03.160000
82	00:00:03.200000
83	00:00:03.239000
84	00:00:03.279000
85	00:00:03.318000
86	00:00:03.358000
87	00:00:03.399000
88	00:00:03.438000
89	00:00:03.478000
90	00:00:03.517000
91	00:00:03.556000
92	00:00:03.596000
93	00:00:03.636000
94	00:00:03.675000
95	00:00:03.715000
96	00:00:03.754000
97	00:00:03.794000
98	00:00:03.833000
99	00:00:03.873000
100	00:00:03.912000
101	00:00:03.952000
102	00:00:03.991000
103	00:00:04.031000
104	00:00:04.070000
105	00:00:04.110000
106	00:00:04.149000
107	00:00:04.189000
108	00:00:04.228000
109	00:00:04.268000
110	00:00:04.307000
111	00:00:04.347000
112	00:00:04.386000
113	00:00:04.426000
114	00:00:04.465000
115	00:00:04.505000
116	00:00:04.544000
117	00:00:04.584000
118	00:00:04.623000
119	00:00:04.663000
120	00:00:04.702000
121	00:00:04.742000
122	00:00:04.781000
123	00:00:04.821000
124	00:00:04.860000
125	00:00:04.900000
126	00:00:04.939000
127	00:00:04.979000
128	00:00:05.019000
129	00:00:05.058000
130	00:00:05.097000
131	00:00:05.137000
132	00:00:05.176000
133	00:00:05.216000
134	00:00:05.256000
135	00:00:05.295000
136	00:00:05.335000
137	00:00:05.374000
138	00:00:05.414000
139	00:00:05.453000
140	00:00:05.493000
141	00:00:05.532000
142	00:00:05.572000
143	00:00:05.611000
144	00:00:05.651000
145	00:00:05.690000
146	00:00:05.730000
147	00:00:05.769000
148	00:00:05.809000
149	00:00:05.848000
150	00:00:05.888000
151	00:00:05.927000
152	00:00:05.967000
153	00:00:06.006000
154	00:00:06.046000
155	00:00:06.085000
156	00:00:06.125000
157	00:00:06.164000
158	00:00:06.204000
159	00:00:06.243000
160	00:00:06.283000
161	00:00:06.322000
162	00:00:06.362000
163	00:00:06.401000
164	00:00:06.441000
165	00:00:06.480000
166	00:00:06.520000
167	00:00:06.559000
168	00:00:06.599000
169	00:00:06.638000
170	00:00:06.678000
171	00:00:06.718000
172	00:00:06.757000
173	00:00:06.797000
174	00:00:06.836000
175	00:00:06.876000
176	00:00:06.915000
177	00:00:06.955000
178	00:00:06.994000
179	00:00:07.034000
180	00:00:07.073000
181	00:00:07.113000
182	00:00:07.152000
183	00:00:07.192000
184	00:00:07.231000
185	00:00:07.271000
186	00:00:07.310000
187	00:00:07.350000
188	00:00:07.389000
189	00:00:07.429000
190	00:00:07.468000
191	00:00:07.508000
192	00:00:07.547000
193	00:00:07.587000
194	00:00:07.626000
195	00:00:07.666000
196	00:00:07.705000
197	00:00:07.745000
198	00:00:07.784000
199	00:00:07.824000
200	00:00:07.863000
201	00:00:07.903000
202	00:00:07.942000
203	00:00:07.982000
204	00:00:08.021000
205	00:00:08.061000
206	00:00:08.100000
207	00:00:08.140000
208	00:00:08.179000
209	00:00:08.219000
210	00:00:08.259000
211	00:00:08.298000
212	00:00:08.338000
213	00:00:08.377000
214	00:00:08.417000
215	00:00:08.456000
216	00:00:08.496000
217	00:00:08.535000
218	00:00:08.575000
219	00:00:08.614000
220	00:00:08.654000
221	00:00:08.693000
222	00:00:08.733000
223	00:00:08.772000
224	00:00:08.812000
225	00:00:08.851000
226	00:00:08.891000
227	00:00:08.930000
228	00:00:08.970000
229	00:00:09.009000
230	00:00:09.049000
231	00:00:09.088000
232	00:00:09.128000
233	00:00:09.167000
234	00:00:09.207000
235	00:00:09.246000
236	00:00:09.286000
237	00:00:09.325000
238	00:00:09.365000
239	00:00:09.404000
240	00:00:09.444000
241	00:00:09.483000
242	00:00:09.523000
243	00:00:09.562000
244	00:00:09.602000
245	00:00:09.641000
246	00:00:09.681000
247	00:00:09.720000
248	00:00:09.760000
249	00:00:09.799000
250	00:00:09.839000
251	00:00:09.879000
252	00:00:09.918000
253	00:00:09.957000
254	00:00:09.997000
255	00:00:10.036000
256	00:00:10.076000
257	00:00:10.116000
258	00:00:10.155000
259	00:00:10.195000
260	00:00:10.234000
261	00:00:10.274000
262	00:00:10.313000
263	00:00:10.353000
264	00:00:10.392000
265	00:00:10.432000
266	00:00:10.471000
267	00:00:10.511000
268	00:00:10.550000
269	00:00:10.590000
270	00:00:10.629000
271	00:00:10.669000
272	00:00:10.708000
273	00:00:10.748000
274	00:00:10.787000
275	00:00:10.827000
276	00:00:10.866000
277	00:00:10.906000
278	00:00:10.945000
279	00:00:10.985000
280	00:00:11.024000
281	00:00:11.064000
282	00:00:11.103000
283	00:00:11.143000
284	00:00:11.182000
285	00:00:11.222000
286	00:00:11.261000
287	00:00:11.301000
288	00:00:11.340000
289	00:00:11.380000
290	00:00:11.419000
291	00:00:11.459000
292	00:00:11.498000
293	00:00:11.538000
294	00:00:11.578000
295	00:00:11.617000
296	00:00:11.657000
297	00:00:11.696000
298	00:00:11.736000
299	00:00:11.775000
300	00:00:11.815000
301	00:00:11.854000
302	00:00:11.894000
303	00:00:11.933000
304	00:00:11.973000
305	00:00:12.012000
306	00:00:12.052000
307	00:00:12.091000
308	00:00:12.131000
309	00:00:12.170000
310	00:00:12.210000
311	00:00:12.249000
312	00:00:12.289000
313	00:00:12.328000
314	00:00:12.368000
315	00:00:12.407000
316	00:00:12.447000
317	00:00:12.486000
318	00:00:12.526000
319	00:00:12.565000
320	00:00:12.605000
321	00:00:12.644000
322	00:00:12.684000
323	00:00:12.723000
324	00:00:12.763000
325	00:00:12.802000
326	00:00:12.842000
327	00:00:12.881000
328	00:00:12.921000
329	00:00:12.960000
330	00:00:13
331	00:00:13.039000
332	00:00:13.079000
333	00:00:13.119000
334	00:00:13.158000
335	00:00:13.198000
336	00:00:13.237000
337	00:00:13.277000
338	00:00:13.316000
339	00:00:13.355000
340	00:00:13.396000
341	00:00:13.436000
342	00:00:13.475000
343	00:00:13.515000
344	00:00:13.554000
345	00:00:13.594000
346	00:00:13.633000
347	00:00:13.673000
348	00:00:13.712000
349	00:00:13.752000
350	00:00:13.791000
351	00:00:13.831000
352	00:00:13.870000
353	00:00:13.910000
354	00:00:13.949000
355	00:00:13.989000
356	00:00:14.028000
357	00:00:14.068000
358	00:00:14.107000
359	00:00:14.147000
360	00:00:14.186000
361	00:00:14.226000
362	00:00:14.265000
363	00:00:14.305000
364	00:00:14.344000
365	00:00:14.384000
366	00:00:14.423000
367	00:00:14.463000
368	00:00:14.502000
369	00:00:14.542000
370	00:00:14.582000
371	00:00:14.621000
372	00:00:14.660000
373	00:00:14.700000
374	00:00:14.739000
375	00:00:14.779000
376	00:00:14.818000
377	00:00:14.858000
378	00:00:14.898000
379	00:00:14.937000
380	00:00:14.977000
381	00:00:15.016000
382	00:00:15.056000
383	00:00:15.095000
384	00:00:15.135000
385	00:00:15.174000
386	00:00:15.214000
387	00:00:15.253000
388	00:00:15.293000
389	00:00:15.332000
390	00:00:15.372000
391	00:00:15.411000
392	00:00:15.451000
393	00:00:15.490000
394	00:00:15.530000
395	00:00:15.569000
396	00:00:15.609000
397	00:00:15.648000
398	00:00:15.688000
399	00:00:15.727000
400	00:00:15.767000
401	00:00:15.806000
402	00:00:15.846000
403	00:00:15.885000
404	00:00:15.925000
405	00:00:15.964000
406	00:00:16.004000
407	00:00:16.043000
408	00:00:16.083000
409	00:00:16.122000
410	00:00:16.162000
411	00:00:16.201000
412	00:00:16.241000
413	00:00:16.280000
414	00:00:16.320000
415	00:00:16.359000
416	00:00:16.399000
417	00:00:16.439000
418	00:00:16.478000
419	00:00:16.518000
420	00:00:16.557000
421	00:00:16.597000
422	00:00:16.636000
423	00:00:16.676000
424	00:00:16.715000
425	00:00:16.755000
426	00:00:16.794000
427	00:00:16.834000
428	00:00:16.873000
429	00:00:16.913000
430	00:00:16.952000
431	00:00:16.992000
432	00:00:17.031000
433	00:00:17.071000
434	00:00:17.110000
435	00:00:17.150000
436	00:00:17.189000
437	00:00:17.229000
438	00:00:17.268000
439	00:00:17.308000
440	00:00:17.347000
441	00:00:17.387000
442	00:00:17.426000
443	00:00:17.466000
444	00:00:17.505000
445	00:00:17.545000
446	00:00:17.584000
447	00:00:17.624000
448	00:00:17.663000
449	00:00:17.703000
450	00:00:17.742000
451	00:00:17.782000
452	00:00:17.821000
453	00:00:17.861000
454	00:00:17.900000
455	00:00:17.940000
456	00:00:17.980000
457	00:00:18.019000
458	00:00:18.059000
459	00:00:18.098000
460	00:00:18.138000
461	00:00:18.177000
462	00:00:18.217000
463	00:00:18.256000
464	00:00:18.296000
465	00:00:18.335000
466	00:00:18.375000
467	00:00:18.414000
468	00:00:18.454000
469	00:00:18.493000
470	00:00:18.533000
471	00:00:18.572000
472	00:00:18.612000
473	00:00:18.651000
474	00:00:18.691000
475	00:00:18.730000
476	00:00:18.770000
477	00:00:18.809000
478	00:00:18.849000
479	00:00:18.888000
480	00:00:18.928000
481	00:00:18.967000
482	00:00:19.007000
483	00:00:19.046000
484	00:00:19.086000
485	00:00:19.125000
486	00:00:19.165000
487	00:00:19.204000
488	00:00:19.244000
489	00:00:19.283000
490	00:00:19.323000
491	00:00:19.362000
492	00:00:19.402000
493	00:00:19.441000
494	00:00:19.481000
495	00:00:19.521000
496	00:00:19.560000
497	00:00:19.599000
498	00:00:19.639000
499	00:00:19.678000
500	00:00:19.718000
501	00:00:19.758000
502	00:00:19.797000
503	00:00:19.837000
504	00:00:19.876000
505	00:00:19.916000
506	00:00:19.955000
507	00:00:19.995000
508	00:00:20.034000
509	00:00:20.074000
510	00:00:20.113000
511	00:00:20.153000
512	00:00:20.192000
513	00:00:20.232000
514	00:00:20.271000
515	00:00:20.311000
516	00:00:20.350000
517	00:00:20.390000
518	00:00:20.429000
519	00:00:20.469000
520	00:00:20.508000
521	00:00:20.548000
522	00:00:20.587000
523	00:00:20.627000
524	00:00:20.666000
525	00:00:20.706000
526	00:00:20.745000
527	00:00:20.785000
528	00:00:20.824000
529	00:00:20.864000
530	00:00:20.903000
531	00:00:20.943000
532	00:00:20.982000
533	00:00:21.022000
534	00:00:21.061000
535	00:00:21.101000
536	00:00:21.140000
537	00:00:21.180000
538	00:00:21.219000
539	00:00:21.259000
540	00:00:21.299000
541	00:00:21.338000
542	00:00:21.378000
543	00:00:21.417000
544	00:00:21.457000
545	00:00:21.496000
546	00:00:21.536000
547	00:00:21.575000
548	00:00:21.615000
549	00:00:21.654000
550	00:00:21.694000
551	00:00:21.733000
552	00:00:21.773000
553	00:00:21.812000
554	00:00:21.852000
555	00:00:21.891000
556	00:00:21.931000
557	00:00:21.970000
558	00:00:22.010000
559	00:00:22.049000
560	00:00:22.089000
561	00:00:22.128000
562	00:00:22.168000
563	00:00:22.207000
564	00:00:22.247000
565	00:00:22.286000
566	00:00:22.326000
567	00:00:22.365000
568	00:00:22.405000
569	00:00:22.444000
570	00:00:22.484000
571	00:00:22.523000
572	00:00:22.563000
573	00:00:22.602000
574	00:00:22.642000
575	00:00:22.681000
576	00:00:22.721000
577	00:00:22.761000
578	00:00:22.800000
579	00:00:22.840000
580	00:00:22.879000
581	00:00:22.919000
582	00:00:22.958000
583	00:00:22.997000
584	00:00:23.037000
585	00:00:23.077000
586	00:00:23.116000
587	00:00:23.156000
588	00:00:23.195000
589	00:00:23.235000
590	00:00:23.274000
591	00:00:23.314000
592	00:00:23.353000
593	00:00:23.394000
594	00:00:23.433000
595	00:00:23.473000
596	00:00:23.512000
597	00:00:23.552000
598	00:00:23.591000
599	00:00:23.631000
600	00:00:23.670000
601	00:00:23.710000
602	00:00:23.749000
603	00:00:23.789000
604	00:00:23.828000
605	00:00:23.868000
606	00:00:23.907000
607	00:00:23.947000
608	00:00:23.986000
609	00:00:24.026000
610	00:00:24.065000
611	00:00:24.105000
612	00:00:24.144000
613	00:00:24.184000
614	00:00:24.223000
615	00:00:24.263000
616	00:00:24.302000
617	00:00:24.342000
618	00:00:24.381000
619	00:00:24.421000
620	00:00:24.460000
621	00:00:24.500000
622	00:00:24.539000
623	00:00:24.579000
624	00:00:24.619000
625	00:00:24.658000
626	00:00:24.698000
627	00:00:24.737000
628	00:00:24.777000
629	00:00:24.816000
630	00:00:24.856000
631	00:00:24.895000
632	00:00:24.935000
633	00:00:24.974000
634	00:00:25.014000
635	00:00:25.053000
636	00:00:25.093000

## Sheet: #5
frame	time	PC	TB	ant isth	mid isth	post isth
35	00:00:01.317000
36	00:00:01.356000
37	00:00:01.396000
38	00:00:01.435000
39	00:00:01.475000
40	00:00:01.514000
41	00:00:01.554000
42	00:00:01.593000
43	00:00:01.633000
44	00:00:01.672000
45	00:00:01.712000
46	00:00:01.751000
47	00:00:01.791000
48	00:00:01.830000
49	00:00:01.870000
50	00:00:01.909000
51	00:00:01.949000
52	00:00:01.988000
53	00:00:02.028000
54	00:00:02.067000
55	00:00:02.107000
56	00:00:02.146000
57	00:00:02.186000
58	00:00:02.225000
59	00:00:02.265000
60	00:00:02.304000
61	00:00:02.344000
62	00:00:02.384000
63	00:00:02.423000
64	00:00:02.463000
65	00:00:02.502000
66	00:00:02.541000
67	00:00:02.581000
68	00:00:02.620000
69	00:00:02.660000
70	00:00:02.700000
71	00:00:02.739000
72	00:00:02.779000
73	00:00:02.818000
74	00:00:02.858000
75	00:00:02.897000
76	00:00:02.937000
77	00:00:02.976000
78	00:00:03.016000
79	00:00:03.055000
80	00:00:03.095000
81	00:00:03.134000
82	00:00:03.174000
83	00:00:03.213000
84	00:00:03.253000
85	00:00:03.292000
86	00:00:03.332000
87	00:00:03.371000
88	00:00:03.411000
89	00:00:03.450000
90	00:00:03.490000
91	00:00:03.529000
92	00:00:03.569000
93	00:00:03.608000
94	00:00:03.648000
95	00:00:03.687000
96	00:00:03.727000
97	00:00:03.766000
98	00:00:03.806000
99	00:00:03.845000
100	00:00:03.885000
101	00:00:03.924000
102	00:00:03.964000
103	00:00:04.003000
104	00:00:04.043000
105	00:00:04.082000
106	00:00:04.122000
107	00:00:04.161000
108	00:00:04.201000
109	00:00:04.241000
110	00:00:04.280000
111	00:00:04.320000
112	00:00:04.359000
113	00:00:04.399000
114	00:00:04.438000
115	00:00:04.478000
116	00:00:04.517000
117	00:00:04.557000
118	00:00:04.596000
119	00:00:04.636000
120	00:00:04.675000
121	00:00:04.715000
122	00:00:04.754000
123	00:00:04.794000
124	00:00:04.833000
125	00:00:04.873000
126	00:00:04.912000
127	00:00:04.952000
128	00:00:04.991000
129	00:00:05.031000
130	00:00:05.070000
131	00:00:05.110000
132	00:00:05.149000
133	00:00:05.189000
134	00:00:05.228000
135	00:00:05.268000
136	00:00:05.307000
137	00:00:05.347000
138	00:00:05.386000
139	00:00:05.426000
140	00:00:05.465000
141	00:00:05.505000
142	00:00:05.544000
143	00:00:05.584000
144	00:00:05.623000
145	00:00:05.663000
146	00:00:05.703000
147	00:00:05.742000
148	00:00:05.782000
149	00:00:05.821000
150	00:00:05.861000
151	00:00:05.900000
152	00:00:05.940000
153	00:00:05.979000
154	00:00:06.019000
155	00:00:06.058000
156	00:00:06.098000
157	00:00:06.137000
158	00:00:06.177000
159	00:00:06.216000
160	00:00:06.256000
161	00:00:06.295000
162	00:00:06.335000
163	00:00:06.374000
164	00:00:06.414000
165	00:00:06.453000
166	00:00:06.493000
167	00:00:06.532000
168	00:00:06.572000
169	00:00:06.611000
170	00:00:06.651000
171	00:00:06.690000
172	00:00:06.730000
173	00:00:06.769000
174	00:00:06.809000
175	00:00:06.848000
176	00:00:06.888000
177	00:00:06.927000
178	00:00:06.967000
179	00:00:07.006000
180	00:00:07.046000
181	00:00:07.085000
182	00:00:07.125000
183	00:00:07.164000
184	00:00:07.204000
185	00:00:07.243000
186	00:00:07.283000
187	00:00:07.323000
188	00:00:07.362000
189	00:00:07.402000
190	00:00:07.441000
191	00:00:07.480000
192	00:00:07.520000
193	00:00:07.560000
194	00:00:07.599000
195	00:00:07.639000
196	00:00:07.678000
197	00:00:07.718000
198	00:00:07.757000
199	00:00:07.797000
200	00:00:07.836000
201	00:00:07.876000
202	00:00:07.915000
203	00:00:07.955000
204	00:00:07.994000
205	00:00:08.034000
206	00:00:08.073000
207	00:00:08.113000
208	00:00:08.152000
209	00:00:08.192000
210	00:00:08.231000
211	00:00:08.271000
212	00:00:08.310000
213	00:00:08.351000
214	00:00:08.389000
215	00:00:08.429000
216	00:00:08.468000
217	00:00:08.508000
218	00:00:08.547000
219	00:00:08.587000
220	00:00:08.626000
221	00:00:08.666000
222	00:00:08.705000
223	00:00:08.745000
224	00:00:08.784000
225	00:00:08.824000
226	00:00:08.863000
227	00:00:08.903000
228	00:00:08.942000
229	00:00:08.982000
230	00:00:09.023000
231	00:00:09.062000
232	00:00:09.102000
233	00:00:09.141000
234	00:00:09.181000
235	00:00:09.220000
236	00:00:09.260000
237	00:00:09.299000
238	00:00:09.339000
239	00:00:09.378000
240	00:00:09.418000
241	00:00:09.457000
242	00:00:09.497000
243	00:00:09.536000
244	00:00:09.576000
245	00:00:09.615000
246	00:00:09.655000
247	00:00:09.694000
248	00:00:09.734000
249	00:00:09.773000
250	00:00:09.813000
251	00:00:09.852000
252	00:00:09.892000
253	00:00:09.931000
254	00:00:09.971000
255	00:00:10.010000
256	00:00:10.050000
257	00:00:10.089000
258	00:00:10.129000
259	00:00:10.168000
260	00:00:10.208000
261	00:00:10.247000
262	00:00:10.287000
263	00:00:10.326000
264	00:00:10.366000
265	00:00:10.405000
266	00:00:10.445000
267	00:00:10.484000
268	00:00:10.524000
269	00:00:10.564000
270	00:00:10.603000
271	00:00:10.643000
272	00:00:10.682000
273	00:00:10.722000
274	00:00:10.761000
275	00:00:10.801000
276	00:00:10.840000
277	00:00:10.880000
278	00:00:10.919000
279	00:00:10.959000
280	00:00:10.998000
281	00:00:11.038000
282	00:00:11.077000
283	00:00:11.117000
284	00:00:11.156000
285	00:00:11.196000
286	00:00:11.235000
287	00:00:11.275000
288	00:00:11.314000
289	00:00:11.354000
290	00:00:11.393000
291	00:00:11.433000
292	00:00:11.472000
293	00:00:11.512000
294	00:00:11.551000
295	00:00:11.591000
296	00:00:11.630000
297	00:00:11.670000
298	00:00:11.709000
299	00:00:11.749000
300	00:00:11.788000
301	00:00:11.828000
302	00:00:11.867000
303	00:00:11.907000
304	00:00:11.946000
305	00:00:11.986000
306	00:00:12.025000
307	00:00:12.065000
308	00:00:12.105000
309	00:00:12.144000
310	00:00:12.184000
311	00:00:12.223000
312	00:00:12.262000
313	00:00:12.302000
314	00:00:12.341000
315	00:00:12.381000
316	00:00:12.421000
317	00:00:12.460000
318	00:00:12.500000
319	00:00:12.539000
320	00:00:12.579000
321	00:00:12.618000
322	00:00:12.658000
323	00:00:12.697000
324	00:00:12.737000
325	00:00:12.776000
326	00:00:12.816000
327	00:00:12.855000
328	00:00:12.895000
329	00:00:12.934000
330	00:00:12.974000
331	00:00:13.013000
332	00:00:13.053000
333	00:00:13.092000
334	00:00:13.132000
335	00:00:13.171000
336	00:00:13.211000
337	00:00:13.250000
338	00:00:13.290000
339	00:00:13.329000
340	00:00:13.369000
341	00:00:13.408000
342	00:00:13.448000
343	00:00:13.487000
344	00:00:13.527000
345	00:00:13.566000
346	00:00:13.606000
347	00:00:13.645000
348	00:00:13.685000
349	00:00:13.724000
350	00:00:13.764000
351	00:00:13.803000
352	00:00:13.843000
353	00:00:13.883000
354	00:00:13.922000
355	00:00:13.962000
356	00:00:14.001000
357	00:00:14.041000
358	00:00:14.080000
359	00:00:14.120000
360	00:00:14.159000
361	00:00:14.199000
362	00:00:14.238000
363	00:00:14.278000
364	00:00:14.317000
365	00:00:14.357000
366	00:00:14.396000
367	00:00:14.436000
368	00:00:14.475000
369	00:00:14.515000
370	00:00:14.554000
371	00:00:14.594000
372	00:00:14.633000
373	00:00:14.673000
374	00:00:14.712000
375	00:00:14.752000
376	00:00:14.791000
377	00:00:14.831000
378	00:00:14.870000
379	00:00:14.910000
380	00:00:14.949000
381	00:00:14.989000
382	00:00:15.028000
383	00:00:15.068000
384	00:00:15.107000
385	00:00:15.147000
386	00:00:15.186000
387	00:00:15.226000
388	00:00:15.265000
389	00:00:15.305000
390	00:00:15.344000
391	00:00:15.384000
392	00:00:15.424000
393	00:00:15.463000
394	00:00:15.503000
395	00:00:15.542000
396	00:00:15.582000
397	00:00:15.621000
398	00:00:15.661000
399	00:00:15.700000
400	00:00:15.740000
401	00:00:15.779000
402	00:00:15.819000
403	00:00:15.858000
404	00:00:15.898000
405	00:00:15.937000
406	00:00:15.977000
407	00:00:16.016000
408	00:00:16.056000
409	00:00:16.095000
410	00:00:16.135000
411	00:00:16.174000
412	00:00:16.214000
413	00:00:16.253000
414	00:00:16.293000
415	00:00:16.332000
416	00:00:16.372000
417	00:00:16.411000
418	00:00:16.451000
419	00:00:16.490000
420	00:00:16.530000
421	00:00:16.569000
422	00:00:16.609000
423	00:00:16.648000
424	00:00:16.688000
425	00:00:16.727000
426	00:00:16.767000
427	00:00:16.806000
428	00:00:16.846000
429	00:00:16.885000
430	00:00:16.925000
431	00:00:16.965000
432	00:00:17.004000
433	00:00:17.044000
434	00:00:17.083000
435	00:00:17.123000
436	00:00:17.162000
437	00:00:17.202000
438	00:00:17.241000
439	00:00:17.281000
440	00:00:17.320000
441	00:00:17.360000
442	00:00:17.399000
443	00:00:17.439000
444	00:00:17.478000
445	00:00:17.518000
446	00:00:17.557000
447	00:00:17.597000
448	00:00:17.636000
449	00:00:17.676000
450	00:00:17.715000
451	00:00:17.755000
452	00:00:17.794000
453	00:00:17.834000
454	00:00:17.873000
455	00:00:17.913000
456	00:00:17.952000
457	00:00:17.992000
458	00:00:18.031000
459	00:00:18.071000
460	00:00:18.110000
461	00:00:18.150000
462	00:00:18.189000
463	00:00:18.229000
464	00:00:18.268000
465	00:00:18.308000
466	00:00:18.347000
467	00:00:18.387000
468	00:00:18.426000
469	00:00:18.466000
470	00:00:18.505000
471	00:00:18.545000
472	00:00:18.584000
473	00:00:18.624000
474	00:00:18.663000
475	00:00:18.703000
476	00:00:18.743000
477	00:00:18.782000
478	00:00:18.822000
479	00:00:18.861000
480	00:00:18.901000
481	00:00:18.940000
482	00:00:18.980000
483	00:00:19.020000
484	00:00:19.060000
485	00:00:19.099000
486	00:00:19.139000
487	00:00:19.178000
488	00:00:19.218000
489	00:00:19.257000
490	00:00:19.297000
491	00:00:19.336000
492	00:00:19.376000
493	00:00:19.415000
494	00:00:19.455000
495	00:00:19.494000
496	00:00:19.534000
497	00:00:19.573000
498	00:00:19.613000
499	00:00:19.652000
500	00:00:19.692000
501	00:00:19.731000
502	00:00:19.771000
503	00:00:19.810000
504	00:00:19.850000
505	00:00:19.889000
506	00:00:19.929000
507	00:00:19.968000
508	00:00:20.008000
509	00:00:20.047000
510	00:00:20.087000
511	00:00:20.126000
512	00:00:20.166000
513	00:00:20.205000
514	00:00:20.245000
515	00:00:20.285000
516	00:00:20.324000
517	00:00:20.364000
518	00:00:20.403000
519	00:00:20.443000
520	00:00:20.482000
521	00:00:20.522000
522	00:00:20.561000
523	00:00:20.601000
524	00:00:20.640000
525	00:00:20.680000
526	00:00:20.719000
527	00:00:20.759000
528	00:00:20.798000
529	00:00:20.838000
530	00:00:20.877000
531	00:00:20.917000
532	00:00:20.956000
533	00:00:20.996000
534	00:00:21.035000
535	00:00:21.075000
536	00:00:21.114000
537	00:00:21.154000
538	00:00:21.193000
539	00:00:21.233000
540	00:00:21.272000
541	00:00:21.312000
542	00:00:21.351000
543	00:00:21.391000
544	00:00:21.430000
545	00:00:21.470000
546	00:00:21.509000
547	00:00:21.549000
548	00:00:21.588000
549	00:00:21.628000
550	00:00:21.667000
551	00:00:21.707000
552	00:00:21.747000
553	00:00:21.786000
554	00:00:21.826000
555	00:00:21.865000
556	00:00:21.904000
557	00:00:21.944000
558	00:00:21.984000
559	00:00:22.023000
560	00:00:22.063000
561	00:00:22.102000
562	00:00:22.142000
563	00:00:22.181000
564	00:00:22.221000
565	00:00:22.260000
566	00:00:22.300000
567	00:00:22.339000
568	00:00:22.379000
569	00:00:22.418000
570	00:00:22.458000
571	00:00:22.497000
572	00:00:22.537000
573	00:00:22.576000
574	00:00:22.616000
575	00:00:22.655000
576	00:00:22.695000
577	00:00:22.734000
578	00:00:22.774000
579	00:00:22.813000
580	00:00:22.853000
581	00:00:22.892000
582	00:00:22.932000
583	00:00:22.971000
584	00:00:23.011000
585	00:00:23.050000
586	00:00:23.090000
587	00:00:23.129000
588	00:00:23.169000
589	00:00:23.208000
590	00:00:23.248000
591	00:00:23.287000
592	00:00:23.327000
593	00:00:23.366000
594	00:00:23.406000
595	00:00:23.445000
596	00:00:23.485000
597	00:00:23.524000
598	00:00:23.564000
599	00:00:23.604000
600	00:00:23.643000
601	00:00:23.683000
602	00:00:23.722000
603	00:00:23.762000
604	00:00:23.801000
605	00:00:23.841000
606	00:00:23.880000
607	00:00:23.920000
608	00:00:23.959000
609	00:00:23.999000
610	00:00:24.038000
611	00:00:24.078000
612	00:00:24.117000
613	00:00:24.157000
614	00:00:24.196000
615	00:00:24.236000
616	00:00:24.275000
617	00:00:24.315000
618	00:00:24.354000
619	00:00:24.394000
620	00:00:24.433000
621	00:00:24.473000
622	00:00:24.512000
623	00:00:24.552000
624	00:00:24.591000
625	00:00:24.631000
626	00:00:24.670000
627	00:00:24.710000
628	00:00:24.749000
629	00:00:24.789000
630	00:00:24.828000
631	00:00:24.868000
632	00:00:24.907000
633	00:00:24.947000
634	00:00:24.986000
635	00:00:25.026000
636	00:00:25.066000
637	00:00:25.105000
638	00:00:25.145000
639	00:00:25.184000
640	00:00:25.224000
641	00:00:25.263000
642	00:00:25.303000
643	00:00:25.342000
644	00:00:25.382000
645	00:00:25.421000
646	00:00:25.461000
647	00:00:25.500000
648	00:00:25.540000
649	00:00:25.579000
650	00:00:25.619000
651	00:00:25.658000
652	00:00:25.698000
653	00:00:25.737000
654	00:00:25.777000
655	00:00:25.816000
656	00:00:25.856000
657	00:00:25.895000
658	00:00:25.935000
659	00:00:25.974000
660	00:00:26.014000
661	00:00:26.053000
662	00:00:26.093000
663	00:00:26.132000
664	00:00:26.172000
665	00:00:26.211000
666	00:00:26.251000
667	00:00:26.290000
668	00:00:26.330000
669	00:00:26.369000
670	00:00:26.409000
671	00:00:26.448000
672	00:00:26.488000
673	00:00:26.527000
674	00:00:26.567000

## Sheet: #6
frame	time	PC	TB	ant isth	mid isth	post isth
1	00:00:00
2	00:00:00.031000
3	00:00:00.078000
4	00:00:00.095000
5	00:00:00.131000
6	00:00:00.170000
7	00:00:00.210000
8	00:00:00.249000
9	00:00:00.289000
10	00:00:00.328000
11	00:00:00.368000
12	00:00:00.407000
13	00:00:00.447000
14	00:00:00.487000
15	00:00:00.526000
16	00:00:00.566000
17	00:00:00.605000
18	00:00:00.645000
19	00:00:00.684000
20	00:00:00.724000
21	00:00:00.763000
22	00:00:00.803000
23	00:00:00.842000
24	00:00:00.882000
25	00:00:00.921000
26	00:00:00.961000
27	00:00:01
28	00:00:01.040000
29	00:00:01.079000
30	00:00:01.119000
31	00:00:01.158000
32	00:00:01.198000
33	00:00:01.237000
34	00:00:01.277000
35	00:00:01.316000
36	00:00:01.356000
37	00:00:01.395000
38	00:00:01.435000
39	00:00:01.474000
40	00:00:01.514000
41	00:00:01.553000
42	00:00:01.593000
43	00:00:01.632000
44	00:00:01.672000
45	00:00:01.711000
46	00:00:01.751000
47	00:00:01.790000
48	00:00:01.830000
49	00:00:01.869000
50	00:00:01.909000
51	00:00:01.948000
52	00:00:01.988000
53	00:00:02.028000
54	00:00:02.067000
55	00:00:02.107000
56	00:00:02.146000
57	00:00:02.186000
58	00:00:02.225000
59	00:00:02.265000
60	00:00:02.304000
61	00:00:02.344000
62	00:00:02.383000
63	00:00:02.423000
64	00:00:02.462000
65	00:00:02.502000
66	00:00:02.541000
67	00:00:02.581000
68	00:00:02.620000
69	00:00:02.660000
70	00:00:02.699000
71	00:00:02.739000
72	00:00:02.778000
73	00:00:02.818000
74	00:00:02.857000
75	00:00:02.897000
76	00:00:02.936000
77	00:00:02.976000
78	00:00:03.015000
79	00:00:03.055000
80	00:00:03.094000
81	00:00:03.134000
82	00:00:03.173000
83	00:00:03.213000
84	00:00:03.252000
85	00:00:03.292000
86	00:00:03.331000
87	00:00:03.371000
88	00:00:03.410000
89	00:00:03.450000
90	00:00:03.489000
91	00:00:03.529000
92	00:00:03.569000
93	00:00:03.608000
94	00:00:03.648000
95	00:00:03.687000
96	00:00:03.727000
97	00:00:03.766000
98	00:00:03.806000
99	00:00:03.845000
100	00:00:03.885000
101	00:00:03.924000
102	00:00:03.964000
103	00:00:04.003000
104	00:00:04.043000
105	00:00:04.082000
106	00:00:04.122000
107	00:00:04.161000
108	00:00:04.201000
109	00:00:04.240000
110	00:00:04.280000
111	00:00:04.319000
112	00:00:04.359000
113	00:00:04.398000
114	00:00:04.438000
115	00:00:04.477000
116	00:00:04.517000
117	00:00:04.556000
118	00:00:04.596000
119	00:00:04.635000
120	00:00:04.675000
121	00:00:04.714000
122	00:00:04.754000
123	00:00:04.793000
124	00:00:04.833000
125	00:00:04.872000
126	00:00:04.912000
127	00:00:04.951000
128	00:00:04.991000
129	00:00:05.031000
130	00:00:05.070000
131	00:00:05.110000
132	00:00:05.149000
133	00:00:05.188000
134	00:00:05.228000
135	00:00:05.267000
136	00:00:05.307000
137	00:00:05.347000
138	00:00:05.386000
139	00:00:05.426000
140	00:00:05.465000
141	00:00:05.505000
142	00:00:05.544000
143	00:00:05.584000
144	00:00:05.623000
145	00:00:05.663000
146	00:00:05.702000
147	00:00:05.742000
148	00:00:05.781000
149	00:00:05.821000
150	00:00:05.860000
151	00:00:05.900000
152	00:00:05.939000
153	00:00:05.979000
154	00:00:06.018000
155	00:00:06.058000
156	00:00:06.097000
157	00:00:06.137000
158	00:00:06.176000
159	00:00:06.216000
160	00:00:06.255000
161	00:00:06.295000
162	00:00:06.334000
163	00:00:06.374000
164	00:00:06.413000
165	00:00:06.453000
166	00:00:06.492000
167	00:00:06.532000
168	00:00:06.571000
169	00:00:06.611000
170	00:00:06.650000
171	00:00:06.690000
172	00:00:06.729000
173	00:00:06.769000
174	00:00:06.808000
175	00:00:06.848000
176	00:00:06.888000
177	00:00:06.927000
178	00:00:06.967000
179	00:00:07.006000
180	00:00:07.046000
181	00:00:07.085000
182	00:00:07.125000
183	00:00:07.164000
184	00:00:07.204000
185	00:00:07.243000
186	00:00:07.283000
187	00:00:07.322000
188	00:00:07.362000
189	00:00:07.401000
190	00:00:07.441000
191	00:00:07.480000
192	00:00:07.520000
193	00:00:07.559000
194	00:00:07.599000
195	00:00:07.638000
196	00:00:07.678000
197	00:00:07.717000
198	00:00:07.757000
199	00:00:07.796000
200	00:00:07.836000
201	00:00:07.875000
202	00:00:07.915000
203	00:00:07.954000
204	00:00:07.994000
205	00:00:08.033000
206	00:00:08.073000
207	00:00:08.112000
208	00:00:08.152000
209	00:00:08.191000
210	00:00:08.231000
211	00:00:08.270000
212	00:00:08.310000
213	00:00:08.349000
214	00:00:08.389000
215	00:00:08.429000
216	00:00:08.468000
217	00:00:08.508000
218	00:00:08.547000
219	00:00:08.587000
220	00:00:08.626000
221	00:00:08.666000
222	00:00:08.705000
223	00:00:08.745000
224	00:00:08.784000
225	00:00:08.824000
226	00:00:08.863000
227	00:00:08.903000
228	00:00:08.942000
229	00:00:08.982000
230	00:00:09.021000
231	00:00:09.061000
232	00:00:09.101000
233	00:00:09.141000
234	00:00:09.180000
235	00:00:09.220000
236	00:00:09.259000
237	00:00:09.299000
238	00:00:09.338000
239	00:00:09.378000
240	00:00:09.417000
241	00:00:09.457000
242	00:00:09.496000
243	00:00:09.536000
244	00:00:09.575000
245	00:00:09.615000
246	00:00:09.654000
247	00:00:09.694000
248	00:00:09.733000
249	00:00:09.773000
250	00:00:09.812000
251	00:00:09.852000
252	00:00:09.892000
253	00:00:09.931000
254	00:00:09.971000
255	00:00:10.010000
256	00:00:10.049000
257	00:00:10.089000
258	00:00:10.128000
259	00:00:10.168000
260	00:00:10.208000
261	00:00:10.247000
262	00:00:10.287000
263	00:00:10.326000
264	00:00:10.366000
265	00:00:10.405000
266	00:00:10.445000
267	00:00:10.484000
268	00:00:10.524000
269	00:00:10.563000
270	00:00:10.603000
271	00:00:10.642000
272	00:00:10.682000
273	00:00:10.721000
274	00:00:10.761000
275	00:00:10.800000
276	00:00:10.840000
277	00:00:10.879000
278	00:00:10.919000
279	00:00:10.958000
280	00:00:10.998000
281	00:00:11.037000
282	00:00:11.077000
283	00:00:11.116000
284	00:00:11.156000
285	00:00:11.195000
286	00:00:11.235000
287	00:00:11.274000
288	00:00:11.314000
289	00:00:11.353000
290	00:00:11.393000
291	00:00:11.432000
292	00:00:11.472000
293	00:00:11.511000
294	00:00:11.551000
295	00:00:11.590000
296	00:00:11.630000
297	00:00:11.669000
298	00:00:11.709000
299	00:00:11.749000
300	00:00:11.788000
301	00:00:11.828000
302	00:00:11.867000
303	00:00:11.907000
304	00:00:11.946000
305	00:00:11.986000
306	00:00:12.025000
307	00:00:12.065000
308	00:00:12.104000
309	00:00:12.144000
310	00:00:12.183000
311	00:00:12.223000
312	00:00:12.262000
313	00:00:12.302000
314	00:00:12.341000
315	00:00:12.381000
316	00:00:12.420000
317	00:00:12.460000
318	00:00:12.499000
319	00:00:12.539000
320	00:00:12.578000
321	00:00:12.618000
322	00:00:12.657000
323	00:00:12.697000
324	00:00:12.736000
325	00:00:12.776000
326	00:00:12.815000
327	00:00:12.855000
328	00:00:12.894000
329	00:00:12.934000
330	00:00:12.973000
331	00:00:13.013000
332	00:00:13.052000
333	00:00:13.092000
334	00:00:13.131000
335	00:00:13.171000
336	00:00:13.211000
337	00:00:13.250000
338	00:00:13.290000
339	00:00:13.329000
340	00:00:13.369000
341	00:00:13.408000
342	00:00:13.448000
343	00:00:13.487000
344	00:00:13.527000
345	00:00:13.566000
346	00:00:13.606000
347	00:00:13.645000
348	00:00:13.685000
349	00:00:13.724000
350	00:00:13.764000
351	00:00:13.803000
352	00:00:13.843000
353	00:00:13.882000
354	00:00:13.922000
355	00:00:13.961000
356	00:00:14.001000
357	00:00:14.040000
358	00:00:14.080000
359	00:00:14.119000
360	00:00:14.159000
361	00:00:14.198000
362	00:00:14.238000
363	00:00:14.277000
364	00:00:14.317000
365	00:00:14.356000
366	00:00:14.396000
367	00:00:14.435000
368	00:00:14.475000
369	00:00:14.514000
370	00:00:14.554000
371	00:00:14.593000
372	00:00:14.633000
373	00:00:14.672000
374	00:00:14.712000
375	00:00:14.752000
376	00:00:14.791000
377	00:00:14.831000
378	00:00:14.870000
379	00:00:14.909000
380	00:00:14.949000
381	00:00:14.988000
382	00:00:15.028000
383	00:00:15.068000
384	00:00:15.107000
385	00:00:15.147000
386	00:00:15.186000
387	00:00:15.226000
388	00:00:15.265000
389	00:00:15.305000
390	00:00:15.344000
391	00:00:15.384000
392	00:00:15.423000
393	00:00:15.463000
394	00:00:15.502000
395	00:00:15.542000
396	00:00:15.581000
397	00:00:15.621000
398	00:00:15.660000
399	00:00:15.700000
400	00:00:15.739000
401	00:00:15.779000
402	00:00:15.818000
403	00:00:15.858000
404	00:00:15.897000
405	00:00:15.937000
406	00:00:15.976000
407	00:00:16.016000
408	00:00:16.055000
409	00:00:16.095000
410	00:00:16.134000
411	00:00:16.174000
412	00:00:16.213000
413	00:00:16.253000
414	00:00:16.292000
415	00:00:16.332000
416	00:00:16.371000
417	00:00:16.411000
418	00:00:16.450000
419	00:00:16.490000
420	00:00:16.530000
421	00:00:16.569000
422	00:00:16.609000
423	00:00:16.648000
424	00:00:16.688000
425	00:00:16.727000
426	00:00:16.767000
427	00:00:16.806000
428	00:00:16.846000
429	00:00:16.885000
430	00:00:16.925000
431	00:00:16.964000
432	00:00:17.004000
433	00:00:17.043000
434	00:00:17.083000
435	00:00:17.122000
436	00:00:17.162000
437	00:00:17.201000
438	00:00:17.241000
439	00:00:17.280000
440	00:00:17.320000
441	00:00:17.359000
442	00:00:17.399000
443	00:00:17.438000
444	00:00:17.478000
445	00:00:17.517000
446	00:00:17.557000
447	00:00:17.596000
448	00:00:17.636000
449	00:00:17.675000
450	00:00:17.715000
451	00:00:17.754000
452	00:00:17.794000
453	00:00:17.833000
454	00:00:17.873000
455	00:00:17.912000
456	00:00:17.952000
457	00:00:17.991000
458	00:00:18.031000
459	00:00:18.071000
460	00:00:18.110000
461	00:00:18.150000
462	00:00:18.189000
463	00:00:18.229000
464	00:00:18.268000
465	00:00:18.308000
466	00:00:18.347000
467	00:00:18.387000
468	00:00:18.426000
469	00:00:18.466000
470	00:00:18.505000
471	00:00:18.545000
472	00:00:18.584000
473	00:00:18.624000
474	00:00:18.663000
475	00:00:18.703000
476	00:00:18.742000
477	00:00:18.782000
478	00:00:18.821000
479	00:00:18.861000
480	00:00:18.900000
481	00:00:18.940000
482	00:00:18.979000
483	00:00:19.019000
484	00:00:19.058000
485	00:00:19.099000
486	00:00:19.138000
487	00:00:19.178000
488	00:00:19.217000
489	00:00:19.257000
490	00:00:19.296000
491	00:00:19.336000
492	00:00:19.375000
493	00:00:19.415000
494	00:00:19.454000
495	00:00:19.494000
496	00:00:19.533000
497	00:00:19.573000
498	00:00:19.613000
499	00:00:19.652000
500	00:00:19.691000
501	00:00:19.731000
502	00:00:19.771000
503	00:00:19.810000
504	00:00:19.849000
505	00:00:19.889000
506	00:00:19.929000
507	00:00:19.968000
508	00:00:20.008000
509	00:00:20.047000
510	00:00:20.087000
511	00:00:20.126000
512	00:00:20.166000
513	00:00:20.205000
514	00:00:20.245000
515	00:00:20.284000
516	00:00:20.324000
517	00:00:20.363000
518	00:00:20.403000
519	00:00:20.442000
520	00:00:20.482000
521	00:00:20.521000
522	00:00:20.561000
523	00:00:20.600000
524	00:00:20.640000
525	00:00:20.679000
526	00:00:20.719000
527	00:00:20.758000
528	00:00:20.798000
529	00:00:20.837000
530	00:00:20.877000
531	00:00:20.916000
532	00:00:20.956000
533	00:00:20.995000
534	00:00:21.035000
535	00:00:21.074000
536	00:00:21.114000
537	00:00:21.153000
538	00:00:21.193000
539	00:00:21.232000
540	00:00:21.272000
541	00:00:21.311000
542	00:00:21.351000
543	00:00:21.391000
544	00:00:21.430000
545	00:00:21.470000
546	00:00:21.509000
547	00:00:21.549000
548	00:00:21.588000
549	00:00:21.628000
550	00:00:21.667000
551	00:00:21.707000
552	00:00:21.746000
553	00:00:21.786000
554	00:00:21.825000
555	00:00:21.865000
556	00:00:21.904000
557	00:00:21.944000
558	00:00:21.983000
559	00:00:22.023000
560	00:00:22.062000
561	00:00:22.102000
562	00:00:22.141000
563	00:00:22.181000
564	00:00:22.220000
565	00:00:22.260000
566	00:00:22.299000
567	00:00:22.339000
568	00:00:22.378000
569	00:00:22.418000
570	00:00:22.457000
571	00:00:22.497000
572	00:00:22.536000
573	00:00:22.576000
574	00:00:22.615000
575	00:00:22.655000
576	00:00:22.694000
577	00:00:22.734000
578	00:00:22.773000
579	00:00:22.813000
580	00:00:22.852000
581	00:00:22.892000
582	00:00:22.932000
583	00:00:22.971000
584	00:00:23.011000
585	00:00:23.050000
586	00:00:23.090000
587	00:00:23.129000
588	00:00:23.169000
589	00:00:23.208000
590	00:00:23.248000
591	00:00:23.287000
592	00:00:23.327000
593	00:00:23.366000
594	00:00:23.406000
595	00:00:23.445000
596	00:00:23.485000
597	00:00:23.524000
598	00:00:23.564000
599	00:00:23.603000
600	00:00:23.643000
601	00:00:23.682000
602	00:00:23.722000

## Sheet: #7
frame	time	PC	TB	ant isth	mid isth	post isth
1	00:00:00
2	00:00:00.039000
3	00:00:00.079000
4	00:00:00.118000
5	00:00:00.158000
6	00:00:00.197000
7	00:00:00.237000
8	00:00:00.276000
9	00:00:00.316000
10	00:00:00.355000
11	00:00:00.395000
12	00:00:00.434000
13	00:00:00.474000
14	00:00:00.513000
15	00:00:00.553000
16	00:00:00.592000
17	00:00:00.632000
18	00:00:00.671000
19	00:00:00.711000
20	00:00:00.751000
21	00:00:00.790000
22	00:00:00.830000
23	00:00:00.869000
24	00:00:00.909000
25	00:00:00.948000
26	00:00:00.988000
27	00:00:01.027000
28	00:00:01.067000
29	00:00:01.106000
30	00:00:01.146000
31	00:00:01.185000
32	00:00:01.225000
33	00:00:01.264000
34	00:00:01.304000
35	00:00:01.343000
36	00:00:01.383000
37	00:00:01.422000
38	00:00:01.462000
39	00:00:01.501000
40	00:00:01.541000
41	00:00:01.580000
42	00:00:01.620000
43	00:00:01.659000
44	00:00:01.699000
45	00:00:01.738000
46	00:00:01.778000
47	00:00:01.817000
48	00:00:01.857000
49	00:00:01.896000
50	00:00:01.936000
51	00:00:01.975000
52	00:00:02.015000
53	00:00:02.054000
54	00:00:02.094000
55	00:00:02.133000
56	00:00:02.173000
57	00:00:02.212000
58	00:00:02.252000
59	00:00:02.292000
60	00:00:02.331000
61	00:00:02.371000
62	00:00:02.410000
63	00:00:02.449000
64	00:00:02.489000
65	00:00:02.529000
66	00:00:02.568000
67	00:00:02.608000
68	00:00:02.647000
69	00:00:02.687000
70	00:00:02.726000
71	00:00:02.766000
72	00:00:02.805000
73	00:00:02.845000
74	00:00:02.884000
75	00:00:02.924000
76	00:00:02.963000
77	00:00:03.003000
78	00:00:03.042000
79	00:00:03.082000
80	00:00:03.121000
81	00:00:03.161000
82	00:00:03.200000
83	00:00:03.240000
84	00:00:03.279000
85	00:00:03.319000
86	00:00:03.358000
87	00:00:03.398000
88	00:00:03.437000
89	00:00:03.477000
90	00:00:03.516000
91	00:00:03.556000
92	00:00:03.595000
93	00:00:03.635000
94	00:00:03.674000
95	00:00:03.714000
96	00:00:03.753000
97	00:00:03.793000
98	00:00:03.832000
99	00:00:03.872000
100	00:00:03.911000
101	00:00:03.951000
102	00:00:03.990000
103	00:00:04.030000
104	00:00:04.070000
105	00:00:04.109000
106	00:00:04.149000
107	00:00:04.188000
108	00:00:04.228000
109	00:00:04.267000
110	00:00:04.307000
111	00:00:04.346000
112	00:00:04.386000
113	00:00:04.425000
114	00:00:04.465000
115	00:00:04.504000
116	00:00:04.544000
117	00:00:04.583000
118	00:00:04.623000
119	00:00:04.662000
120	00:00:04.702000
121	00:00:04.741000
122	00:00:04.781000
123	00:00:04.820000
124	00:00:04.860000
125	00:00:04.899000
126	00:00:04.939000
127	00:00:04.978000
128	00:00:05.019000
129	00:00:05.058000
130	00:00:05.098000
131	00:00:05.137000
132	00:00:05.177000
133	00:00:05.216000
134	00:00:05.256000
135	00:00:05.295000
136	00:00:05.335000
137	00:00:05.374000
138	00:00:05.414000
139	00:00:05.453000
140	00:00:05.493000
141	00:00:05.533000
142	00:00:05.572000
143	00:00:05.612000
144	00:00:05.651000
145	00:00:05.691000
146	00:00:05.730000
147	00:00:05.769000
148	00:00:05.809000
149	00:00:05.849000
150	00:00:05.888000
151	00:00:05.928000
152	00:00:05.967000
153	00:00:06.007000
154	00:00:06.046000
155	00:00:06.086000
156	00:00:06.125000
157	00:00:06.165000
158	00:00:06.204000
159	00:00:06.244000
160	00:00:06.283000
161	00:00:06.323000
162	00:00:06.362000
163	00:00:06.402000
164	00:00:06.441000
165	00:00:06.481000
166	00:00:06.520000
167	00:00:06.560000
168	00:00:06.599000
169	00:00:06.639000
170	00:00:06.678000
171	00:00:06.718000
172	00:00:06.757000
173	00:00:06.797000
174	00:00:06.836000
175	00:00:06.876000
176	00:00:06.915000
177	00:00:06.955000
178	00:00:06.994000
179	00:00:07.034000
180	00:00:07.073000
181	00:00:07.113000
182	00:00:07.152000
183	00:00:07.192000
184	00:00:07.231000
185	00:00:07.271000
186	00:00:07.310000
187	00:00:07.350000
188	00:00:07.390000
189	00:00:07.429000
190	00:00:07.469000
191	00:00:07.508000
192	00:00:07.548000
193	00:00:07.587000
194	00:00:07.627000
195	00:00:07.666000
196	00:00:07.706000
197	00:00:07.745000
198	00:00:07.785000
199	00:00:07.824000
200	00:00:07.864000
201	00:00:07.903000
202	00:00:07.943000
203	00:00:07.982000
204	00:00:08.022000
205	00:00:08.061000
206	00:00:08.101000
207	00:00:08.140000
208	00:00:08.180000
209	00:00:08.219000
210	00:00:08.259000
211	00:00:08.298000
212	00:00:08.338000
213	00:00:08.377000
214	00:00:08.417000
215	00:00:08.456000
216	00:00:08.496000
217	00:00:08.535000
218	00:00:08.575000
219	00:00:08.614000
220	00:00:08.654000
221	00:00:08.693000
222	00:00:08.733000
223	00:00:08.772000
224	00:00:08.812000
225	00:00:08.852000
226	00:00:08.891000
227	00:00:08.931000
228	00:00:08.970000
229	00:00:09.010000
230	00:00:09.049000
231	00:00:09.089000
232	00:00:09.128000
233	00:00:09.168000
234	00:00:09.207000
235	00:00:09.247000
236	00:00:09.286000
237	00:00:09.326000
238	00:00:09.365000
239	00:00:09.405000
240	00:00:09.444000
241	00:00:09.484000
242	00:00:09.523000
243	00:00:09.563000
244	00:00:09.602000
245	00:00:09.642000
246	00:00:09.681000
247	00:00:09.721000
248	00:00:09.760000
249	00:00:09.800000
250	00:00:09.839000
251	00:00:09.879000
252	00:00:09.918000
253	00:00:09.958000
254	00:00:09.997000
255	00:00:10.037000
256	00:00:10.076000
257	00:00:10.116000
258	00:00:10.155000
259	00:00:10.195000
260	00:00:10.234000
261	00:00:10.274000
262	00:00:10.313000
263	00:00:10.353000
264	00:00:10.393000
265	00:00:10.432000
266	00:00:10.472000
267	00:00:10.511000
268	00:00:10.551000
269	00:00:10.590000
270	00:00:10.629000
271	00:00:10.669000
272	00:00:10.721000
273	00:00:10.748000
274	00:00:10.788000
275	00:00:10.827000
276	00:00:10.867000
277	00:00:10.906000
278	00:00:10.946000
279	00:00:10.985000
280	00:00:11.025000
281	00:00:11.064000
282	00:00:11.104000
283	00:00:11.143000
284	00:00:11.183000
285	00:00:11.222000
286	00:00:11.262000
287	00:00:11.301000
288	00:00:11.341000
289	00:00:11.380000
290	00:00:11.420000
291	00:00:11.459000
292	00:00:11.499000
293	00:00:11.538000
294	00:00:11.578000
295	00:00:11.617000
296	00:00:11.657000
297	00:00:11.696000
298	00:00:11.736000
299	00:00:11.775000
300	00:00:11.815000
301	00:00:11.854000
302	00:00:11.894000
303	00:00:11.933000
304	00:00:11.973000
305	00:00:12.012000
306	00:00:12.052000
307	00:00:12.091000
308	00:00:12.131000
309	00:00:12.170000
310	00:00:12.210000
311	00:00:12.250000
312	00:00:12.289000
313	00:00:12.329000
314	00:00:12.368000
315	00:00:12.408000
316	00:00:12.447000
317	00:00:12.487000
318	00:00:12.526000
319	00:00:12.566000
320	00:00:12.605000
321	00:00:12.645000
322	00:00:12.684000
323	00:00:12.724000
324	00:00:12.763000
325	00:00:12.803000
326	00:00:12.842000
327	00:00:12.882000
328	00:00:12.921000
329	00:00:12.961000
330	00:00:13
331	00:00:13.040000
332	00:00:13.079000
333	00:00:13.119000
334	00:00:13.158000
335	00:00:13.198000
336	00:00:13.237000
337	00:00:13.277000
338	00:00:13.316000
339	00:00:13.356000
340	00:00:13.395000
341	00:00:13.435000
342	00:00:13.474000
343	00:00:13.514000
344	00:00:13.553000
345	00:00:13.593000
346	00:00:13.632000
347	00:00:13.672000
348	00:00:13.712000
349	00:00:13.751000
350	00:00:13.791000
351	00:00:13.830000
352	00:00:13.870000
353	00:00:13.909000
354	00:00:13.949000
355	00:00:13.988000
356	00:00:14.028000
357	00:00:14.067000
358	00:00:14.107000
359	00:00:14.146000
360	00:00:14.186000
361	00:00:14.225000
362	00:00:14.265000
363	00:00:14.304000
364	00:00:14.344000
365	00:00:14.383000
366	00:00:14.423000
367	00:00:14.462000
368	00:00:14.502000
369	00:00:14.541000
370	00:00:14.581000
371	00:00:14.620000
372	00:00:14.660000
373	00:00:14.699000
374	00:00:14.739000
375	00:00:14.778000
376	00:00:14.818000
377	00:00:14.857000
378	00:00:14.897000
379	00:00:14.936000
380	00:00:14.976000
381	00:00:15.016000
382	00:00:15.056000
383	00:00:15.095000
384	00:00:15.135000
385	00:00:15.174000
386	00:00:15.214000
387	00:00:15.254000
388	00:00:15.293000
389	00:00:15.333000
390	00:00:15.372000
391	00:00:15.412000
392	00:00:15.451000
393	00:00:15.490000
394	00:00:15.530000
395	00:00:15.570000
396	00:00:15.609000
397	00:00:15.649000
398	00:00:15.688000
399	00:00:15.728000
400	00:00:15.767000
401	00:00:15.807000
402	00:00:15.846000
403	00:00:15.886000
404	00:00:15.925000
405	00:00:15.965000
406	00:00:16.004000
407	00:00:16.044000
408	00:00:16.083000
409	00:00:16.123000
410	00:00:16.162000
411	00:00:16.202000
412	00:00:16.241000
413	00:00:16.281000
414	00:00:16.320000
415	00:00:16.360000
416	00:00:16.399000
417	00:00:16.439000
418	00:00:16.478000
419	00:00:16.518000
420	00:00:16.557000
421	00:00:16.597000
422	00:00:16.636000
423	00:00:16.676000
424	00:00:16.715000
425	00:00:16.755000
426	00:00:16.794000
427	00:00:16.834000
428	00:00:16.873000
429	00:00:16.913000
430	00:00:16.952000
431	00:00:16.992000
432	00:00:17.032000
433	00:00:17.071000
434	00:00:17.111000
435	00:00:17.150000
436	00:00:17.190000
437	00:00:17.229000
438	00:00:17.269000
439	00:00:17.308000
440	00:00:17.348000
441	00:00:17.387000
442	00:00:17.427000
443	00:00:17.466000
444	00:00:17.506000
445	00:00:17.545000
446	00:00:17.585000
447	00:00:17.624000
448	00:00:17.664000
449	00:00:17.703000
450	00:00:17.743000
451	00:00:17.782000
452	00:00:17.822000
453	00:00:17.861000
454	00:00:17.901000
455	00:00:17.940000
456	00:00:17.980000
457	00:00:18.019000
458	00:00:18.059000
459	00:00:18.098000
460	00:00:18.138000
461	00:00:18.177000
462	00:00:18.217000
463	00:00:18.256000
464	00:00:18.296000
465	00:00:18.335000
466	00:00:18.375000
467	00:00:18.414000
468	00:00:18.454000
469	00:00:18.493000
470	00:00:18.533000
471	00:00:18.573000
472	00:00:18.612000
473	00:00:18.652000
474	00:00:18.691000
475	00:00:18.731000
476	00:00:18.770000
477	00:00:18.810000
478	00:00:18.849000
479	00:00:18.889000
480	00:00:18.928000
481	00:00:18.968000
482	00:00:19.007000
483	00:00:19.047000
484	00:00:19.086000
485	00:00:19.126000
486	00:00:19.165000
487	00:00:19.205000
488	00:00:19.244000
489	00:00:19.284000
490	00:00:19.323000
491	00:00:19.363000
492	00:00:19.402000
493	00:00:19.442000
494	00:00:19.481000
495	00:00:19.521000
496	00:00:19.560000
497	00:00:19.600000
498	00:00:19.639000
499	00:00:19.679000
500	00:00:19.718000
501	00:00:19.758000
502	00:00:19.797000
503	00:00:19.837000
504	00:00:19.876000
505	00:00:19.916000
506	00:00:19.955000
507	00:00:19.995000
508	00:00:20.034000
509	00:00:20.074000
510	00:00:20.114000
511	00:00:20.153000
512	00:00:20.193000
513	00:00:20.232000
514	00:00:20.272000
515	00:00:20.311000
516	00:00:20.351000
517	00:00:20.390000
518	00:00:20.430000
519	00:00:20.469000
520	00:00:20.509000
521	00:00:20.548000
522	00:00:20.588000
523	00:00:20.627000
524	00:00:20.667000
525	00:00:20.706000
526	00:00:20.746000
527	00:00:20.785000
528	00:00:20.825000
529	00:00:20.864000
530	00:00:20.904000
531	00:00:20.943000
532	00:00:20.983000
533	00:00:21.022000
534	00:00:21.062000
535	00:00:21.101000
536	00:00:21.141000
537	00:00:21.180000
538	00:00:21.220000
539	00:00:21.259000
540	00:00:21.299000
541	00:00:21.338000
542	00:00:21.378000
543	00:00:21.417000
544	00:00:21.457000
545	00:00:21.496000
546	00:00:21.536000
547	00:00:21.575000
548	00:00:21.615000
549	00:00:21.654000
550	00:00:21.694000
551	00:00:21.733000
552	00:00:21.773000
553	00:00:21.812000
554	00:00:21.852000
555	00:00:21.892000
556	00:00:21.931000
557	00:00:21.971000
558	00:00:22.010000
559	00:00:22.050000
560	00:00:22.089000
561	00:00:22.129000
562	00:00:22.168000
563	00:00:22.208000
564	00:00:22.247000
565	00:00:22.287000
566	00:00:22.326000
567	00:00:22.366000
568	00:00:22.405000
569	00:00:22.445000
570	00:00:22.484000
571	00:00:22.524000
572	00:00:22.563000
573	00:00:22.603000
574	00:00:22.642000
575	00:00:22.682000
576	00:00:22.721000
577	00:00:22.761000
578	00:00:22.800000
579	00:00:22.840000
580	00:00:22.879000
581	00:00:22.919000
582	00:00:22.958000
583	00:00:22.998000
584	00:00:23.037000
585	00:00:23.077000
586	00:00:23.116000
587	00:00:23.156000
588	00:00:23.195000
589	00:00:23.235000
590	00:00:23.274000
591	00:00:23.314000
592	00:00:23.353000
593	00:00:23.393000
594	00:00:23.433000
595	00:00:23.472000
596	00:00:23.512000
597	00:00:23.551000
598	00:00:23.591000
599	00:00:23.630000
600	00:00:23.670000
601	00:00:23.709000
602	00:00:23.749000
603	00:00:23.788000
604	00:00:23.828000
605	00:00:23.867000
606	00:00:23.907000
607	00:00:23.946000
608	00:00:23.986000
609	00:00:24.025000
610	00:00:24.065000
611	00:00:24.104000
612	00:00:24.144000
613	00:00:24.183000
614	00:00:24.223000
615	00:00:24.262000
616	00:00:24.302000
617	00:00:24.341000
618	00:00:24.381000
619	00:00:24.420000
620	00:00:24.460000
621	00:00:24.499000
622	00:00:24.539000
623	00:00:24.578000
624	00:00:24.618000
625	00:00:24.657000
626	00:00:24.697000
627	00:00:24.736000
628	00:00:24.776000
629	00:00:24.815000
630	00:00:24.855000
631	00:00:24.895000
632	00:00:24.934000
633	00:00:24.974000
634	00:00:25.014000
635	00:00:25.054000
636	00:00:25.093000
637	00:00:25.133000
638	00:00:25.172000
639	00:00:25.212000
640	00:00:25.251000
641	00:00:25.291000
642	00:00:25.330000
643	00:00:25.370000
644	00:00:25.409000
645	00:00:25.449000
646	00:00:25.488000
647	00:00:25.528000
648	00:00:25.567000
649	00:00:25.607000
650	00:00:25.646000
651	00:00:25.686000
652	00:00:25.725000
653	00:00:25.765000
654	00:00:25.804000
655	00:00:25.844000
656	00:00:25.883000
657	00:00:25.923000
658	00:00:25.962000
659	00:00:26.002000
660	00:00:26.041000
661	00:00:26.081000
662	00:00:26.120000
663	00:00:26.160000
664	00:00:26.199000
665	00:00:26.239000
666	00:00:26.278000
667	00:00:26.318000
668	00:00:26.357000
669	00:00:26.397000
670	00:00:26.436000
671	00:00:26.476000
672	00:00:26.515000
673	00:00:26.555000
674	00:00:26.594000
675	00:00:26.634000
676	00:00:26.673000
677	00:00:26.713000
678	00:00:26.753000
679	00:00:26.792000
680	00:00:26.832000
